# Supplementary material for: Construction of a tumor mutational burden-derived LncRNA prognostic computational framework associated with therapy sensitivity in skin cutaneous melanoma
Source: PubMed Central journal article supplement — J Transl Med. 2024 Oct 24;22:966. doi: 10.1186/s12967-024-05732-4 (PMC11515383; doi:10.1186/s12967-024-05732-4), 2024-10-24
Supplement: 12967_2024_5732_MOESM1_ESM.pdf [file 12967_2024_5732_MOESM1_ESM.pdf]

**Construction of a Tumor Mutational Burden-Derived LncRNA  
Prognostic Computational Framework Associated with Therapy  
Sensitivity in Skin Cutaneous Melanoma**

**Supplementary Materials**

|                                   |    |
|-----------------------------------|----|
| Fig. S1.....                      | 2  |
| Fig. S2.....                      | 3  |
| Fig. S3.....                      | 4  |
| Fig. S4.....                      | 5  |
| Fig. S5.....                      | 6  |
| Fig. S6.....                      | 7  |
| Fig. S7.....                      | 8  |
| Supplementary figure legends..... | 9  |
| Table S1.....                     | 12 |
| Table S2.....                     | 13 |
| Table S3.....                     | 13 |
| Table S4.....                     | 14 |
| Table S5.....                     | 33 |

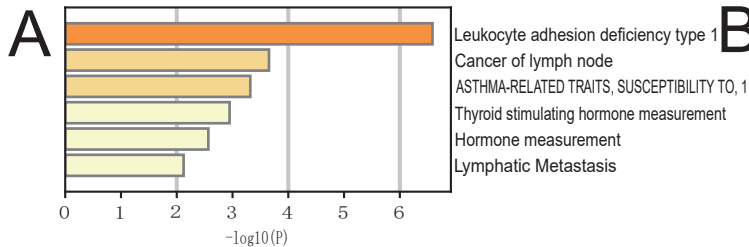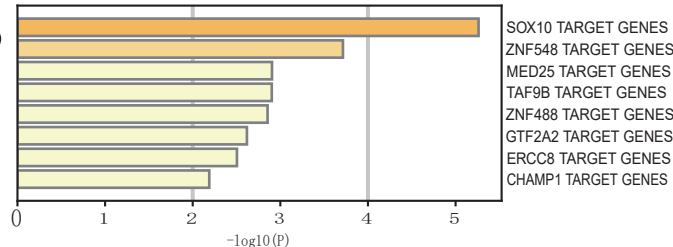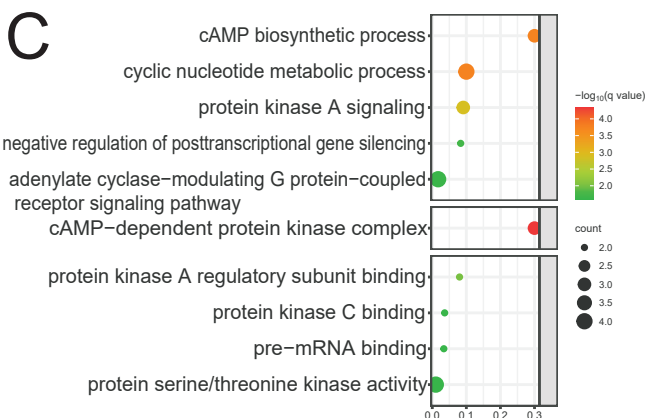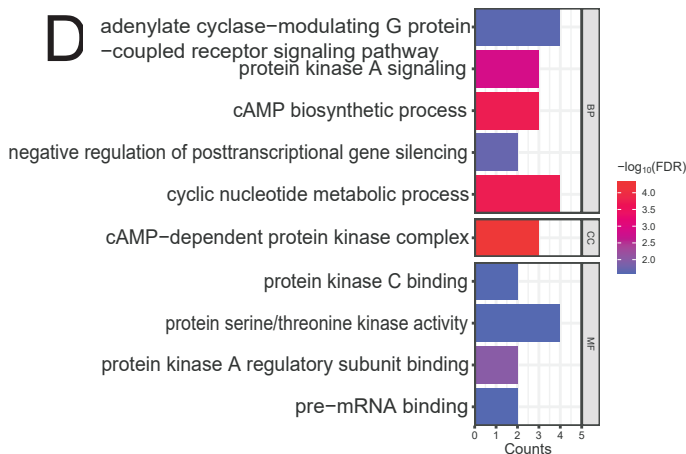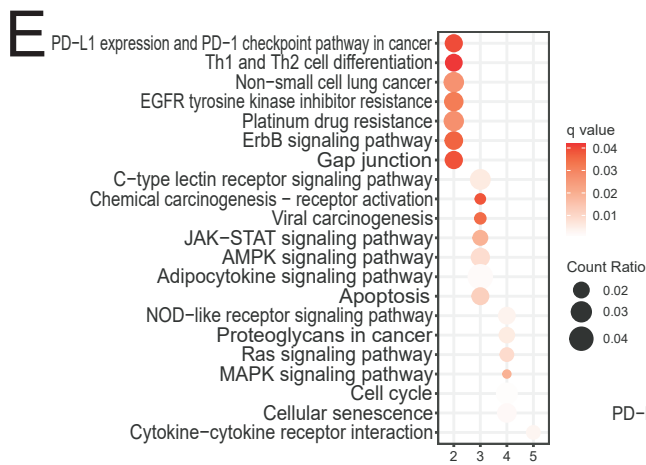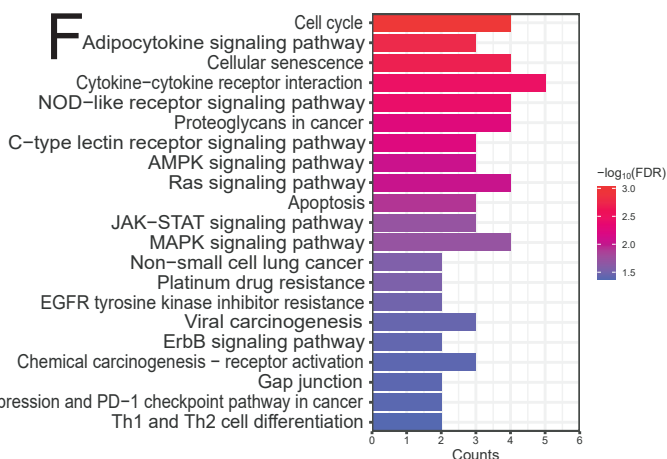

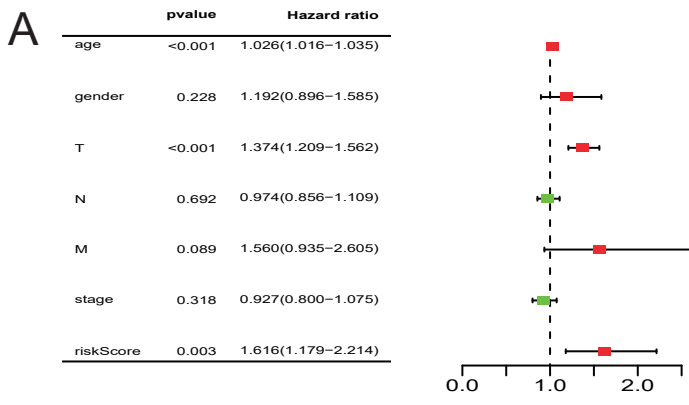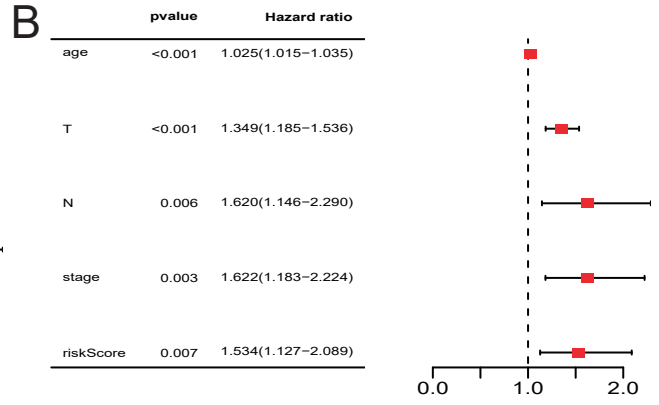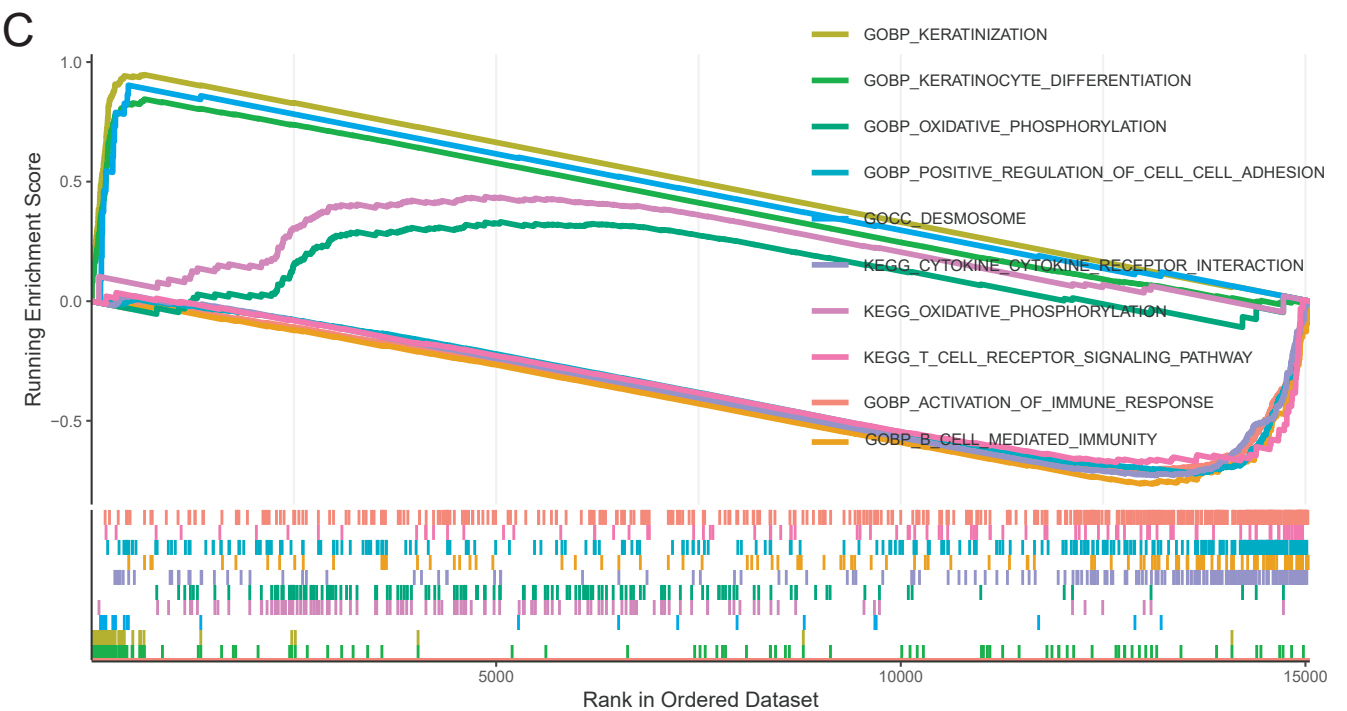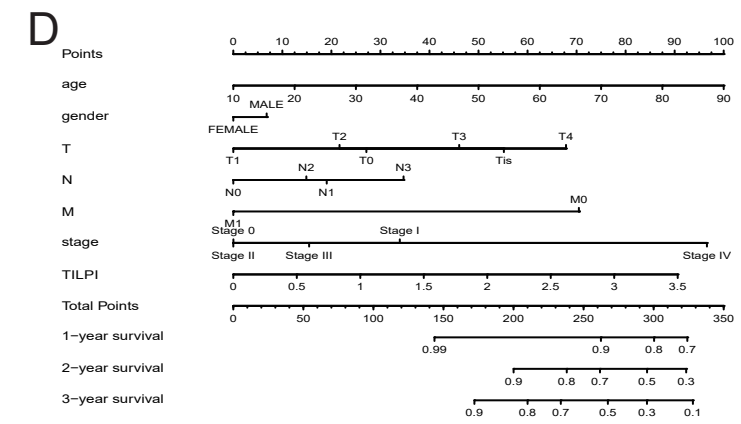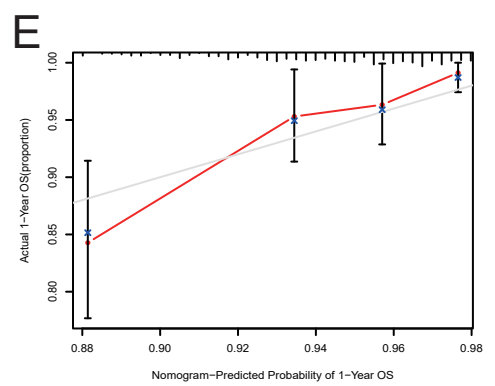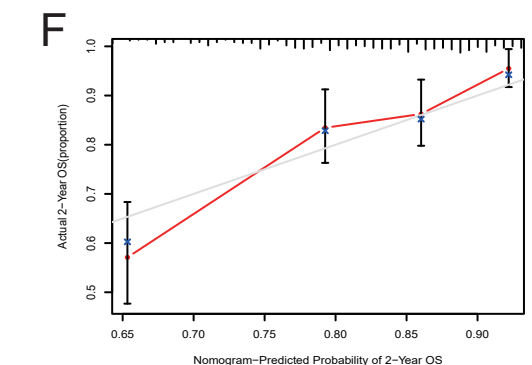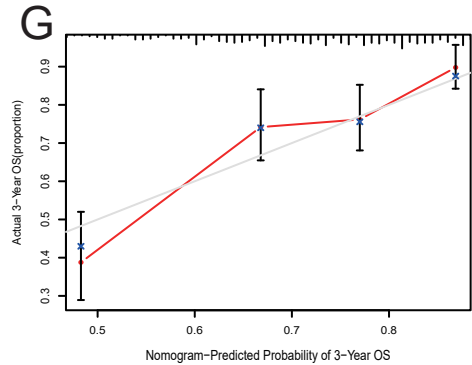

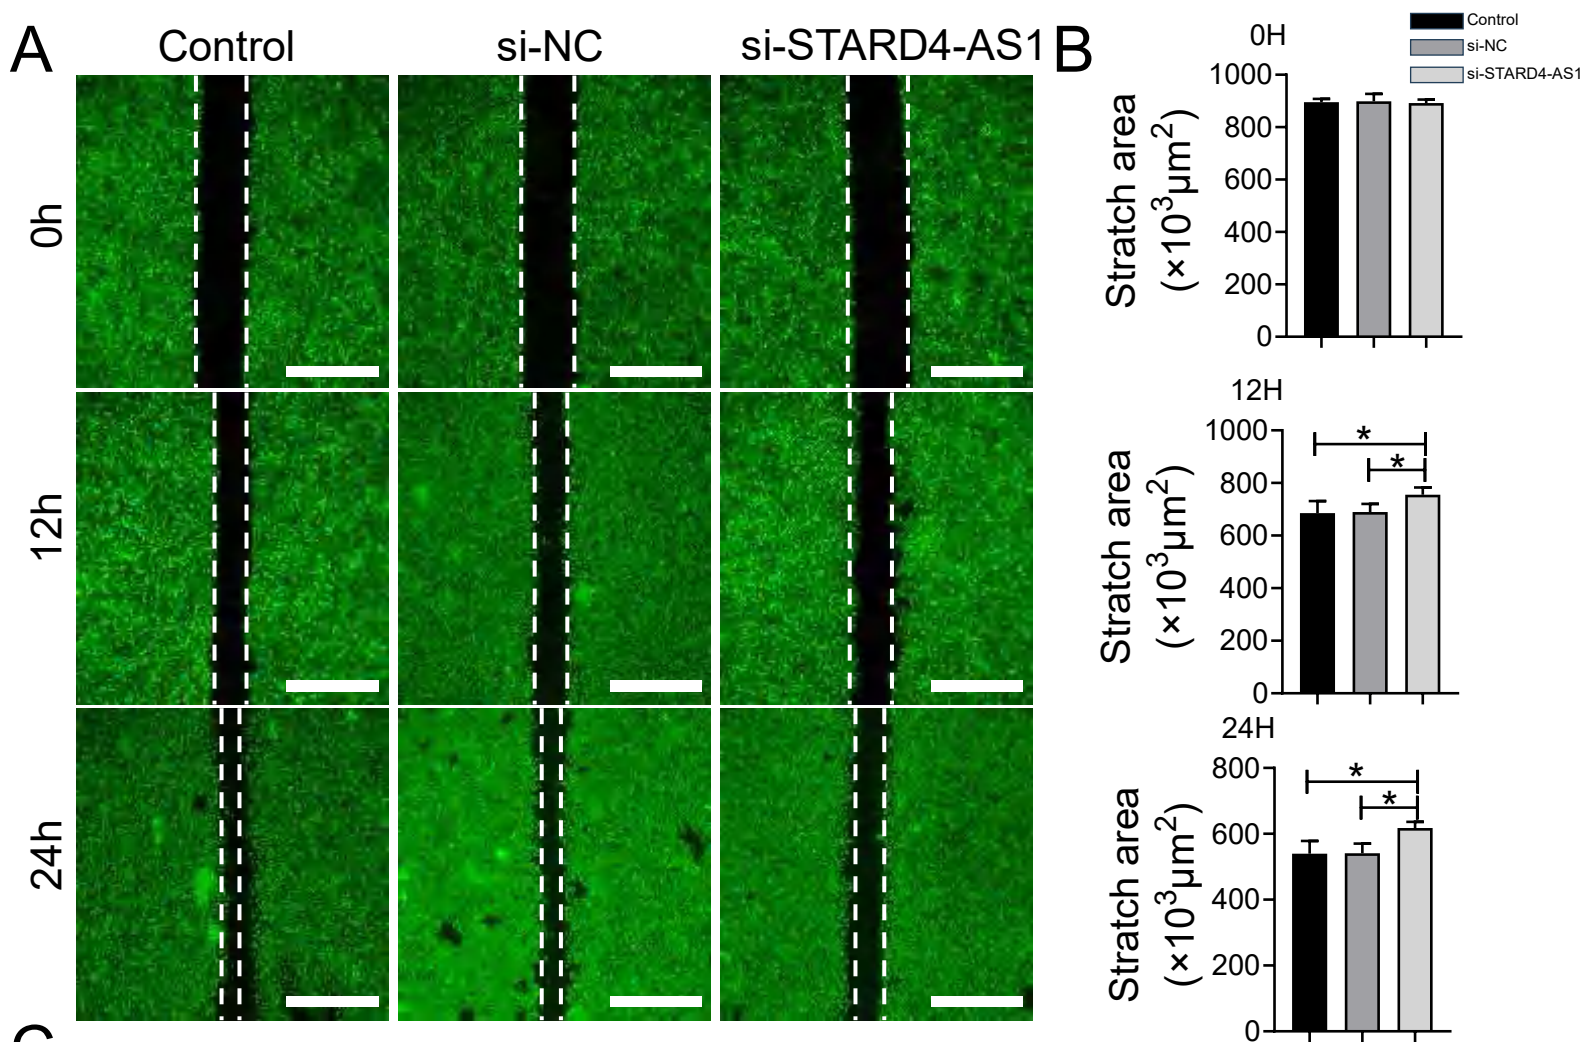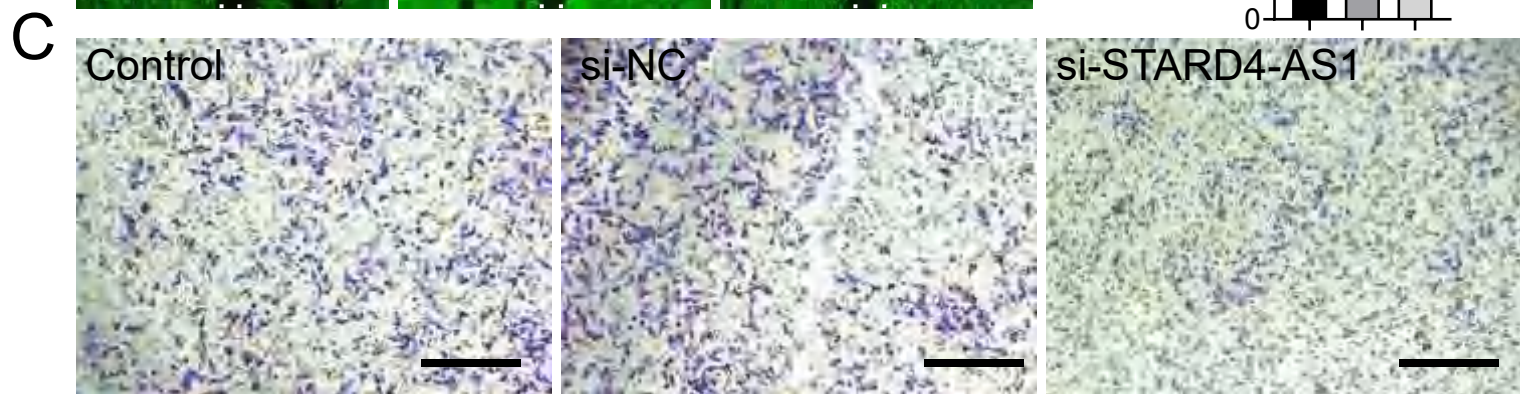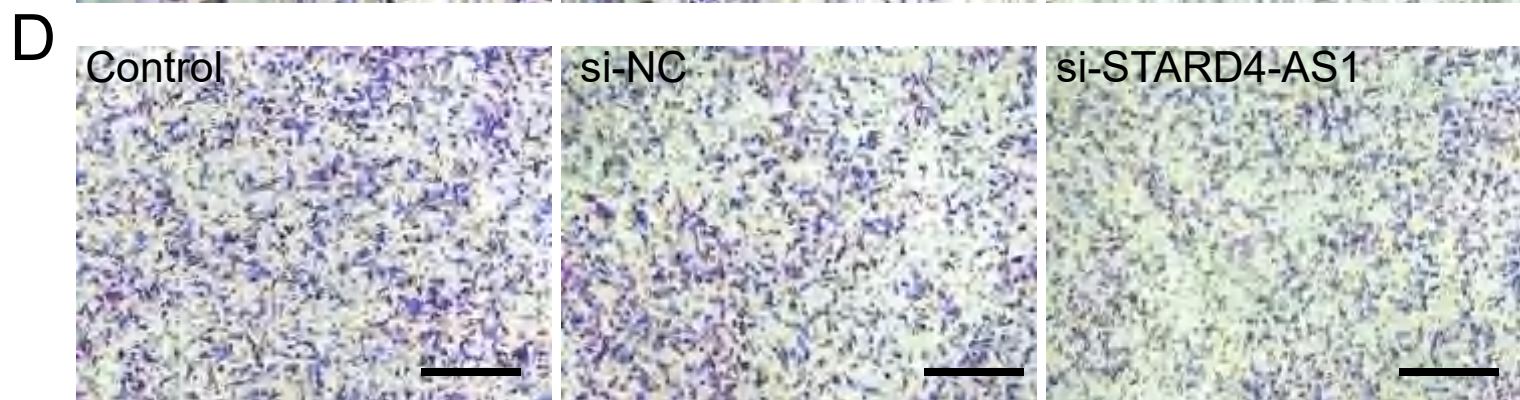



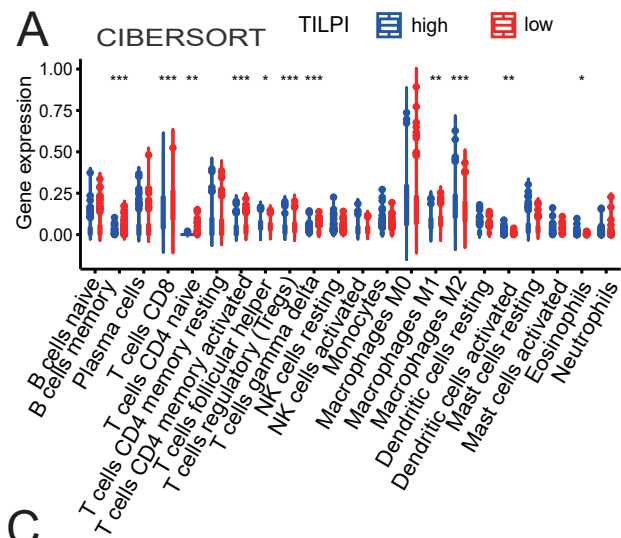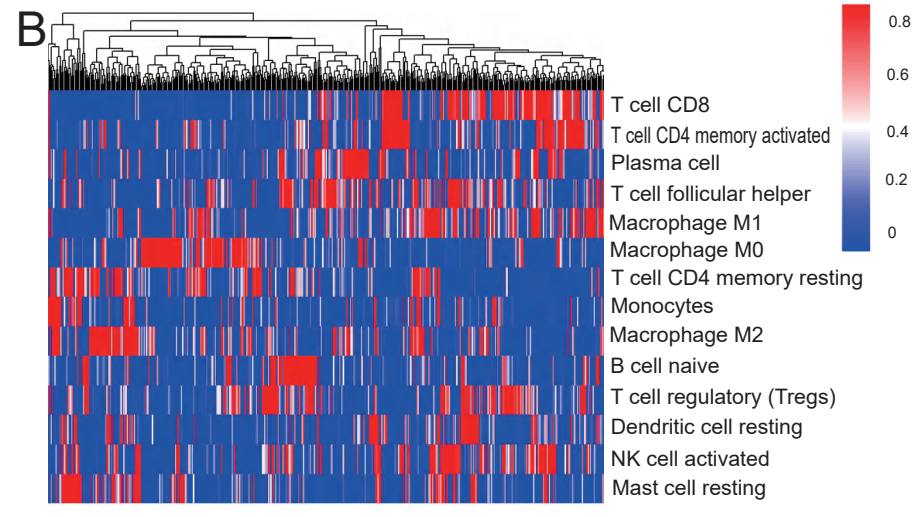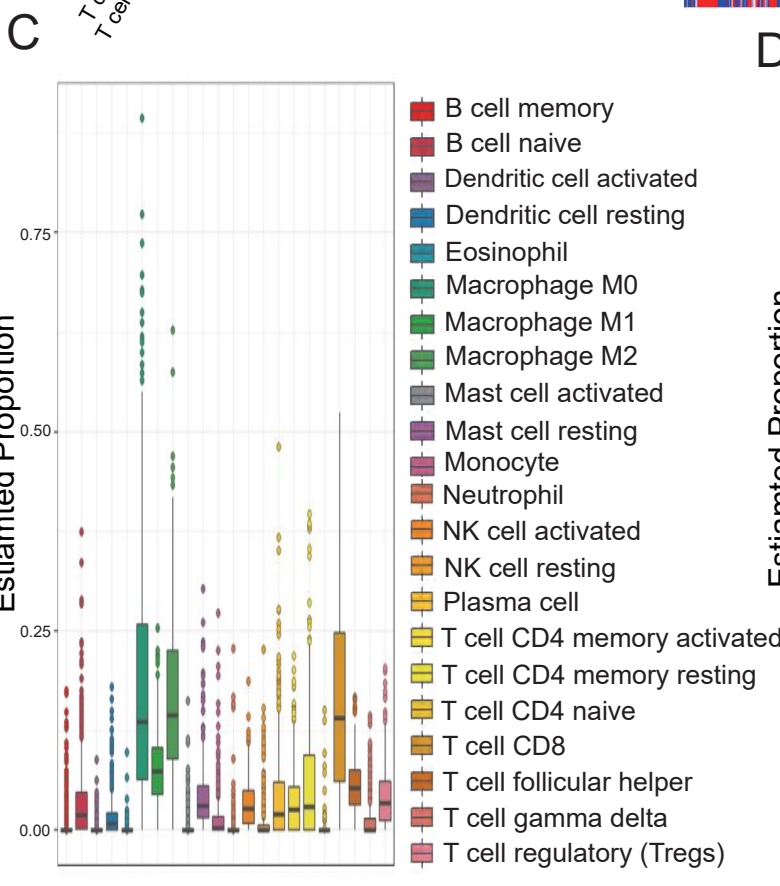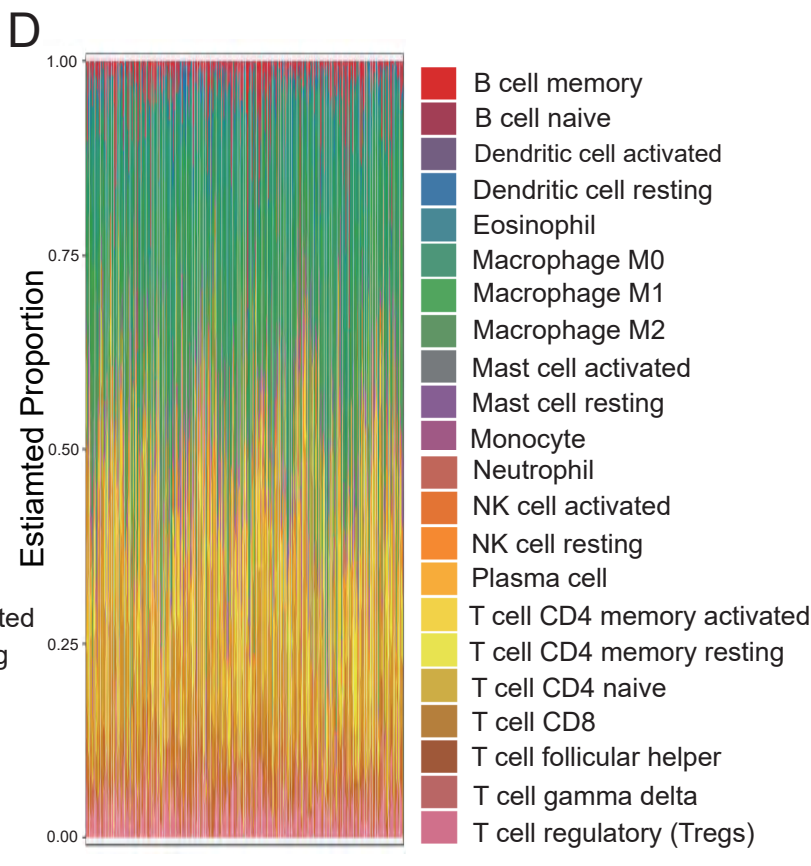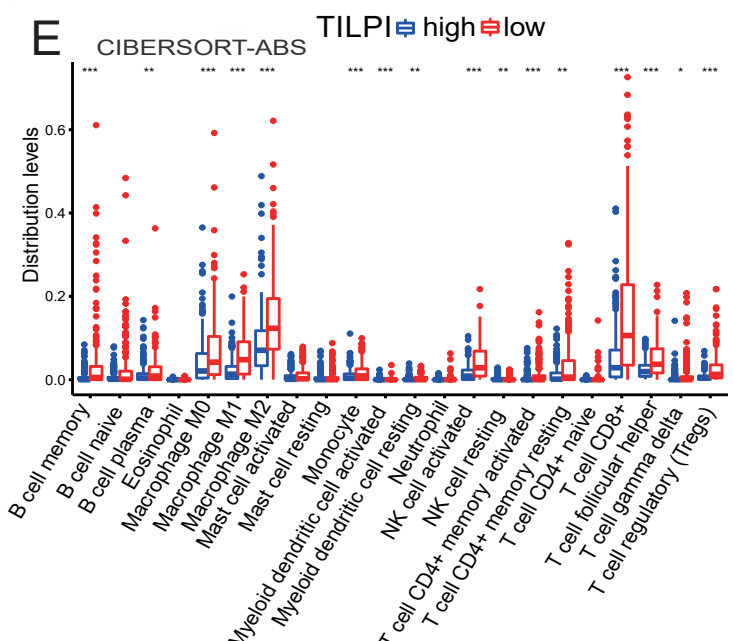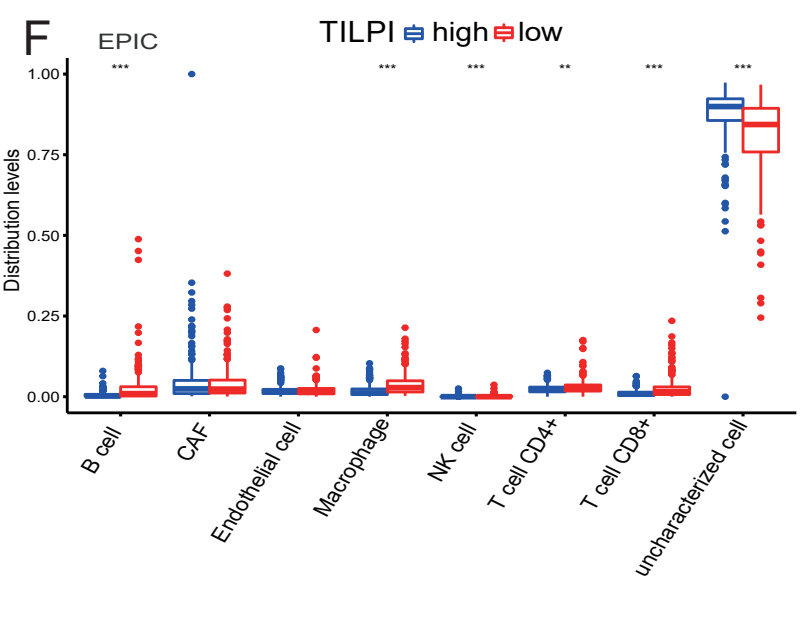

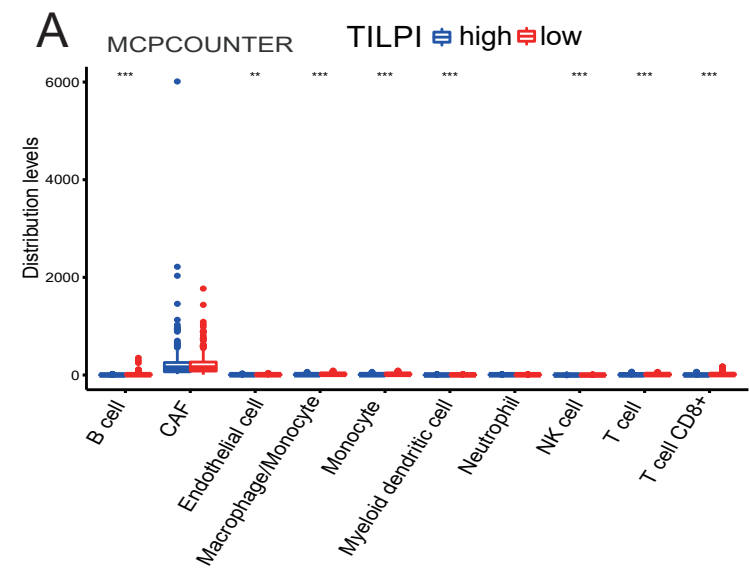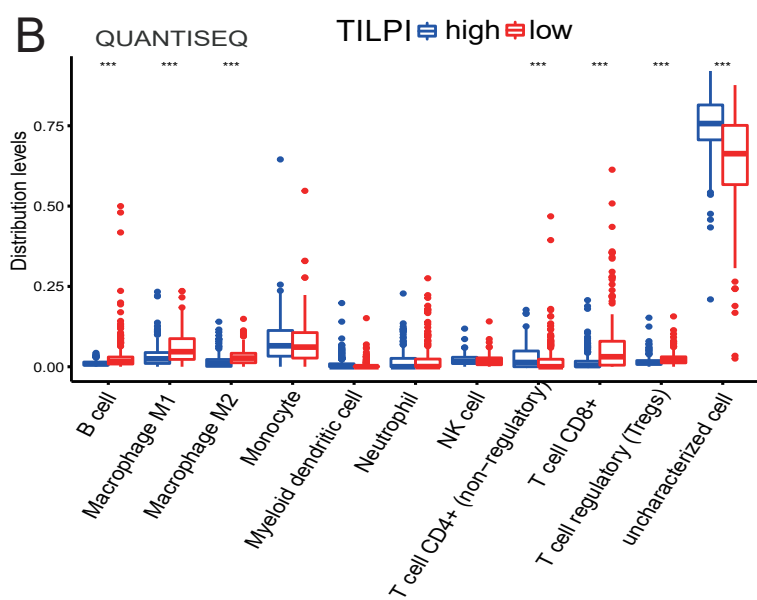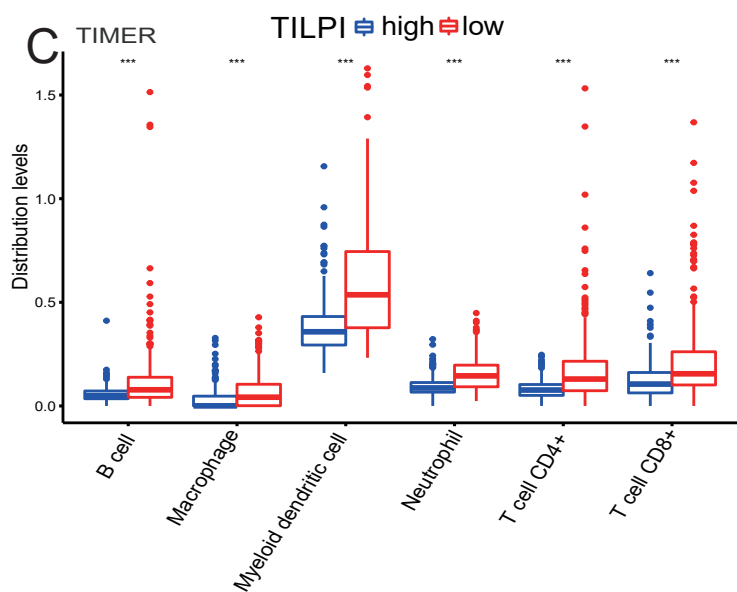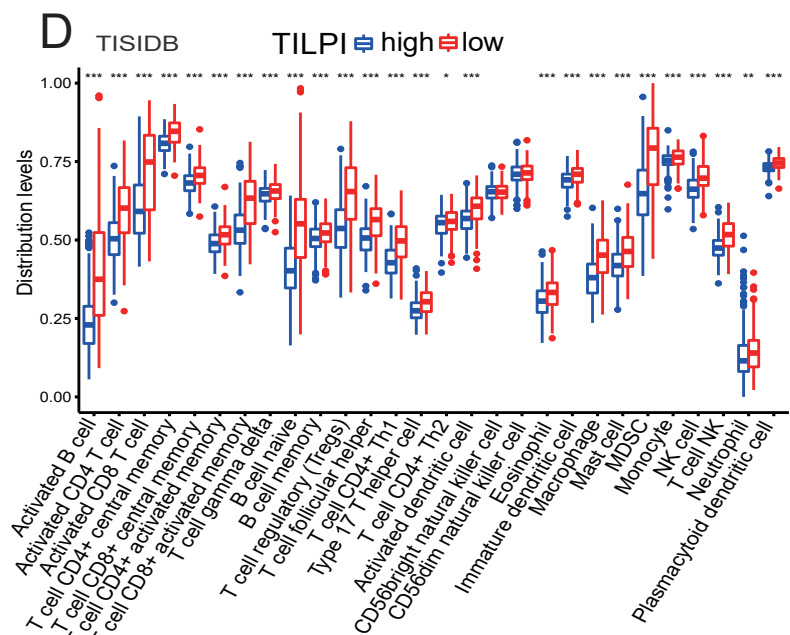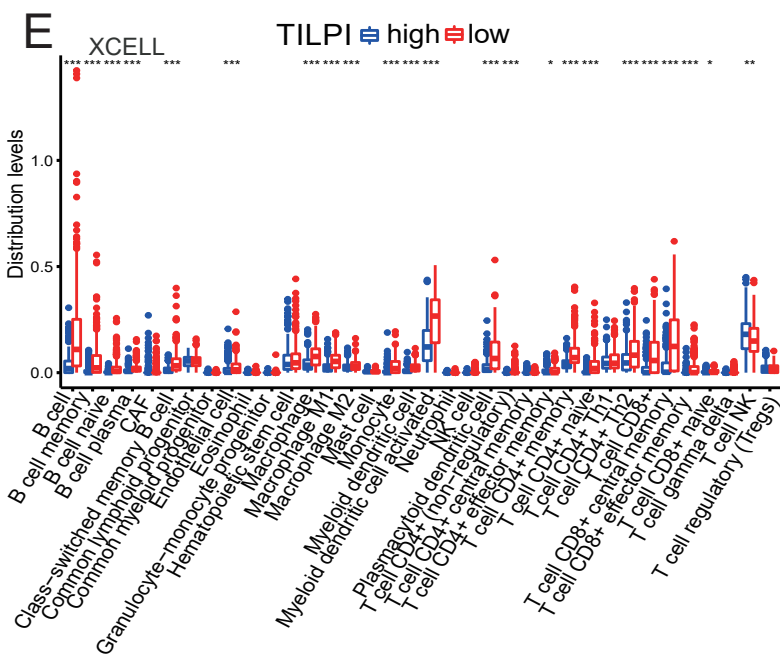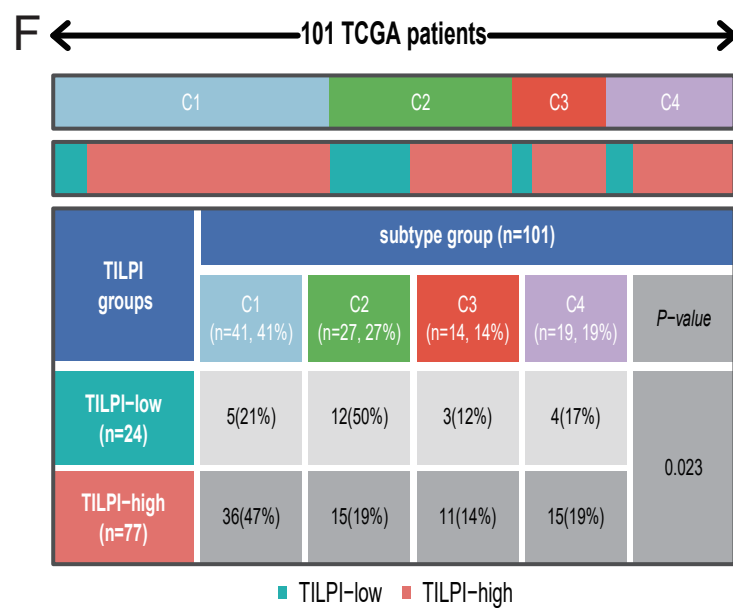

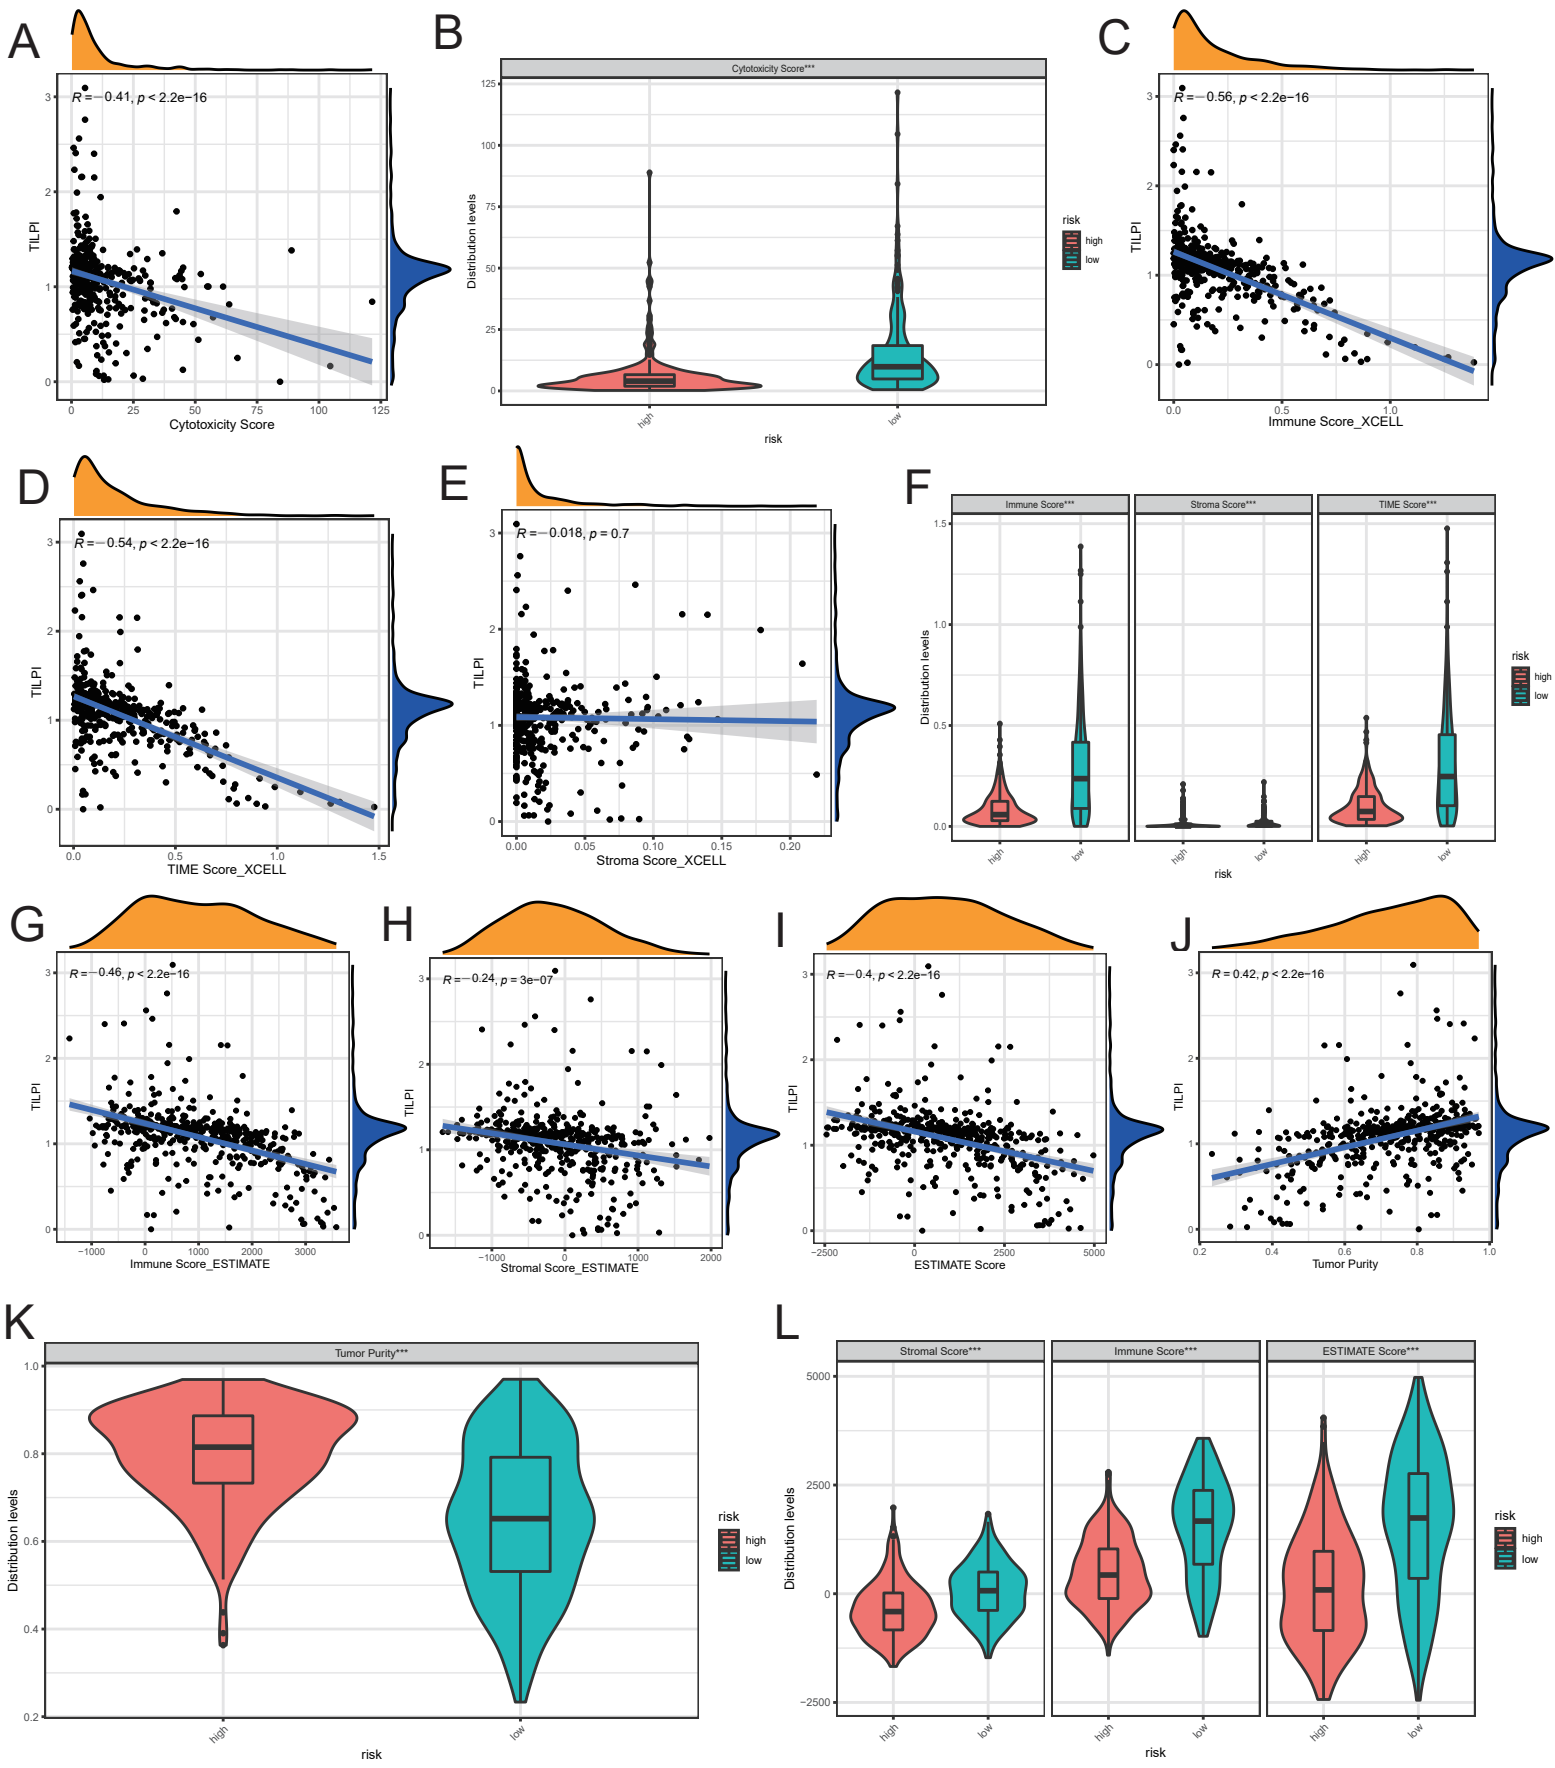

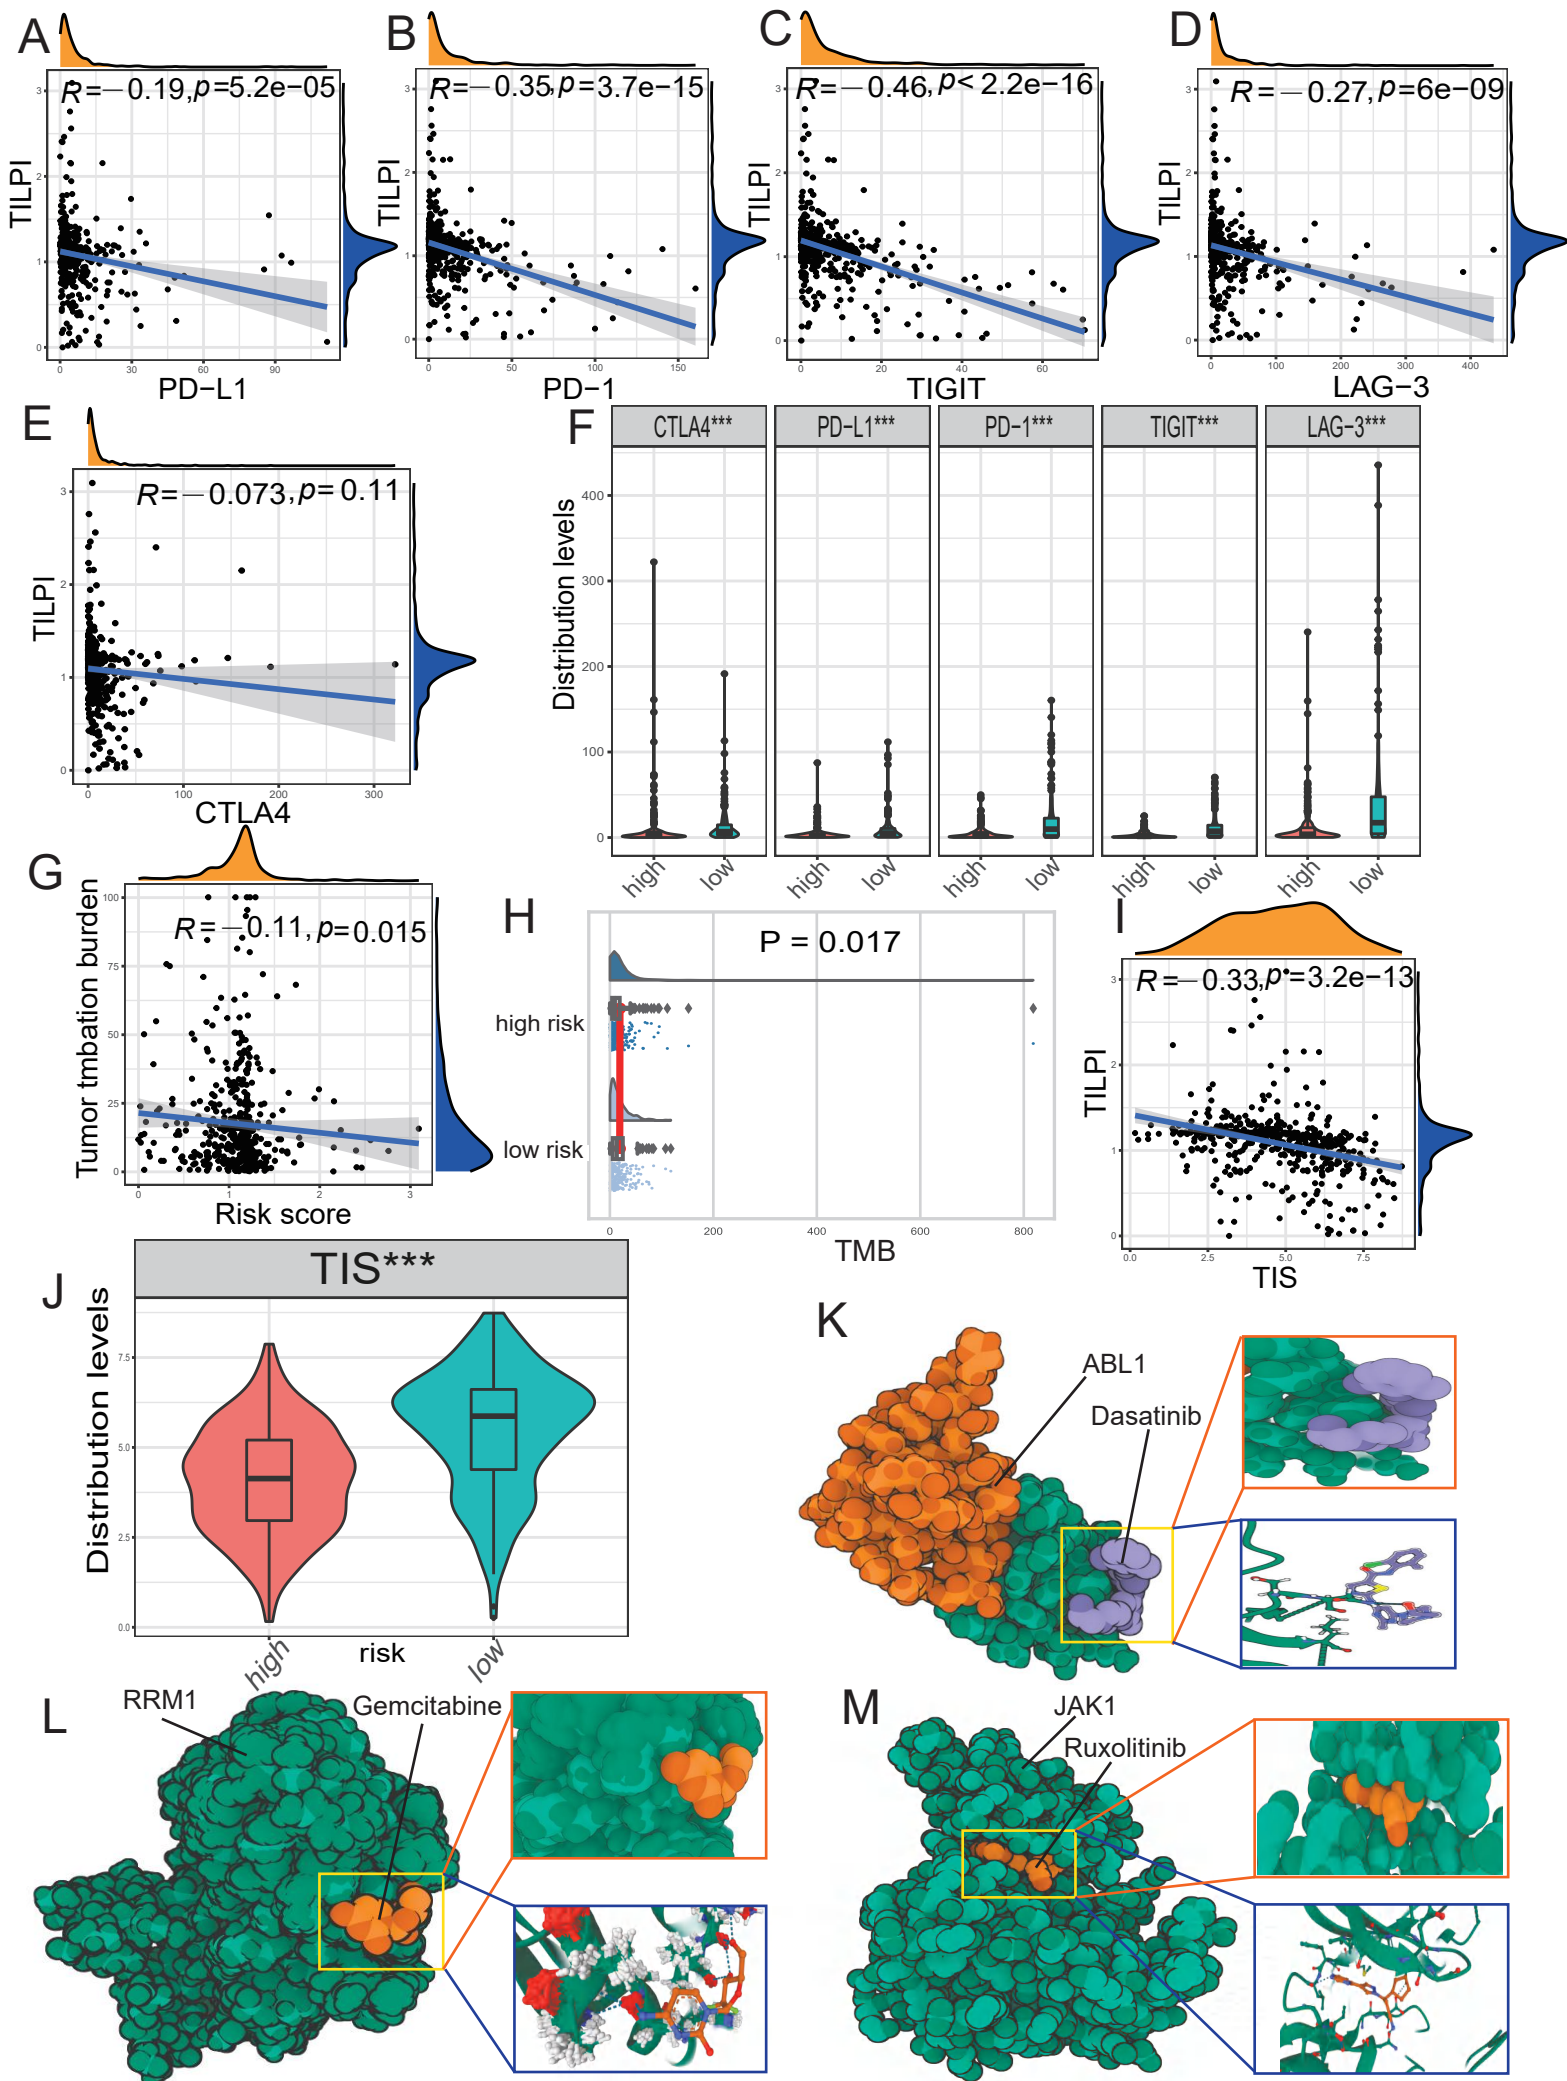



1 **Fig. S1.** Enrichment Analysis of TIgeneSet. (A-B) The enrichment results of  
2 TIgeneSet based on DisGeNET and TRRUST. (C-D): Gene Ontology (GO)  
3 enrichment analysis of TIgeneSet, categorized into three domains: Biological  
4 Processes (BP), Cellular Components (CC), and Molecular Functions (MF). (E-F):  
5 Kyoto Encyclopedia of Genes and Genomes (KEGG) pathway enrichment analysis of  
6 TIgeneSet ( $P < 0.05$ ).

7  
8 **Fig. S2.** Validation and Prognostic Modeling of TILPI with Pathway Enrichment and Survival  
9 Analysis. (A-B) The univariate and multivariate Cox analyses prove the independent prognostic  
10 hazard of TILPI. (C) 10 significantly enriched pathways more existed in different risk subgroups  
11 based on GSEA analysis. (D) A new model was constructed consisting of TILPI and several  
12 clinical characteristics (age, gender, pathological stage, and pathological TNM). (E-G) The 1, 2,  
13 and 3-year survival rate prediction of new model all had a good fit with the actual survival time.

14  
15 **Fig. S3.** Assessment of Cell Proliferation, Migration, and Invasion in Control, si-NC,  
16 and si-STAR4-AS1 Groups. (A) The proliferation ability of cells in the Control,  
17 si-NC, and si-STAR4-AS1 groups at 0, 12, and 24 hours was detected by scratch  
18 test (Scale bar represents 200  $\mu\text{m}$ ). (B) Experimental area analysis of scratches. (C)  
19 Cell migration ability was detected in each group (Scale bar represents 200 $\mu\text{m}$ ). (D)  
20 Cell invasion ability was detected in each group (Scale bar represents 200 $\mu\text{m}$ ).  
21 Statistical differences were determined by utilizing One-way ANOVA with  
22 Bonferroni's multiple comparison tests when comparing three groups. When

23 comparing two groups, the unpaired t-test was utilized. ( $*P < 0.05$ ,  $**P < 0.01$ , and  
24  $***P < 0.001$ ).

25

26 **Fig. S4. Analysis of Differential Immune Cell Distributions Between High and Low TILPI**

27 **Subgroups Using CIBERSORT and Other Algorithms.** (A-D) The differential distributions of

28 immune cell between high and low TILPI subgroups in CIBERSORT. (E-F) The differential

29 distributions of immune cell in different TILPI subgroups were analyzed by different algorithms.

30

31 **Fig. S5. Differential Immune Cell Distributions and Association of TILPI Grouping with Immune**

32 **Subtypes.** (A-E) The differential distributions of immune cell in different TILPI subgroups were

33 analyzed by different algorithms. (F) The grouping of TILPI was associated with the immune

34 subtype, only 101 samples corresponded to immune subtypes. They were classified into four

35 subtypes, with the low TILPI subgroup being more frequently distributed in immune C2, while

36 most samples in the high TILPI subgroup were distributed in immune C1. P-values were

37 calculated using the Chi-square test.

38

39 **Fig. S6. Correlation of TILPI with Cytotoxicity, Immune and Stroma Scores, and TME Metrics.**

40 (A-B) TILPI is negatively correlated with cytotoxicity score. (C-F) Immune score, stroma score,

41 and TME score of XCELL were all negatively correlated with TILPI. (G-L) Stromal score,

42 immune score, and ESTIMATE score of ESTIMATE were all negatively correlated with TILPI,

43 while tumor purity was opposite.

44

45 **Fig. S7.** Correlation of TILPI with Immune Checkpoint Proteins, Tumor Mutational  
46 Burden, TIS Score, and Drug Affinities. (A-F) The immune checkpoint proteins were  
47 all negatively correlated with TILPI, which included PD-L1, PD-1, TIGIT, LAG-3,  
48 and CTLA4. (G-H) TILPI were negatively correlated with TMB. (I-J) The TIS score  
49 was also negatively correlated with TILPI. (K-M) Dasatinib and Ruxolitinib had  
50 excellent affinity for their targets, but Gemcitabine had low affinity for its targets.

51

52

53

54

55

56

57

58

59

60

61

62

63

64

65

66

67 **Supplementary table 1.** Statistics of clinical characteristics for three groups.

| <b>Covariates</b>      | <b>Type</b> | <b>The training group</b> | <b>The testing group</b> | <b>The TCGA group</b> | <b>P value</b> |
|------------------------|-------------|---------------------------|--------------------------|-----------------------|----------------|
| <b>Survival status</b> | dead        | 102(43.97%)               | 115(49.78%)              | 217(46.87%)           | 0.2456         |
|                        | alive       | 130(56.03%)               | 116(50.22%)              | 246(53.13%)           |                |
| <b>OS (years)</b>      | <1          | 29(12.5%)                 | 35(15.15%)               | 64(13.82%)            | 0.3563         |
|                        | [1,5)       | 129(55.6%)                | 111(48.05%)              | 240(51.84%)           |                |
|                        | [5,10)      | 41(17.67%)                | 42(18.18%)               | 83(17.93%)            |                |
|                        | >=10        | 33(14.22%)                | 43(18.61%)               | 76(16.41%)            |                |
| <b>Age</b>             | <=65        | 147(63.36%)               | 152(65.8%)               | 299(64.58%)           | 0.6517         |
|                        | >65         | 85(36.64%)                | 79(34.2%)                | 164(35.42%)           |                |
| <b>Gender</b>          | FEMALE      | 80(34.48%)                | 96(41.56%)               | 176(38.01%)           | 0.1409         |
|                        | MALE        | 152(65.52%)               | 135(58.44%)              | 287(61.99%)           |                |
| <b>T</b>               | T0          | 16(6.9%)                  | 7(3.03%)                 | 23(4.97%)             | 0.2581         |
|                        | T1          | 25(10.78%)                | 20(8.66%)                | 45(9.72%)             |                |
|                        | T2          | 43(18.53%)                | 41(17.75%)               | 84(18.14%)            |                |
|                        | T3          | 40(17.24%)                | 54(23.38%)               | 94(20.3%)             |                |
|                        | T4          | 83(35.78%)                | 76(32.9%)                | 159(34.34%)           |                |
|                        | Tis         | 3(1.29%)                  | 5(2.16%)                 | 8(1.73%)              |                |
|                        | TX          | 22(9.48%)                 | 28(12.12%)               | 50(10.8%)             |                |
| <b>N</b>               | N0          | 114(49.14%)               | 124(53.68%)              | 238(51.4%)            | 0.4032         |
|                        | N1          | 43(18.53%)                | 30(12.99%)               | 73(15.77%)            |                |
|                        | N2          | 24(10.34%)                | 25(10.82%)               | 49(10.58%)            |                |
|                        | N3          | 33(14.22%)                | 28(12.12%)               | 61(13.17%)            |                |
|                        | NX          | 18(7.76%)                 | 24(10.39%)               | 42(9.07%)             |                |
| <b>M</b>               | M0          | 213(91.81%)               | 220(95.24%)              | 433(93.52%)           | 0.1904         |
|                        | M1          | 19(8.19%)                 | 11(4.76%)                | 30(6.48%)             |                |
| <b>Stage</b>           | I/II NOS    | 6(2.59%)                  | 13(5.63%)                | 19(4.1%)              | 0.0629         |
|                        | Stage 0     | 2(0.86%)                  | 5(2.16%)                 | 7(1.51%)              |                |
|                        | Stage I     | 48(20.69%)                | 36(15.58%)               | 84(18.14%)            |                |
|                        | Stage II    | 63(27.16%)                | 83(35.93%)               | 146(31.53%)           |                |
|                        | Stage III   | 95(40.95%)                | 82(35.5%)                | 177(38.23%)           |                |
|                        | Stage IV    | 18(7.76%)                 | 12(5.19%)                | 30(6.48%)             |                |

68

69

70

71



72 **Supplementary table 2.** The sequence of small-interfering RNAs against STARD4-AS1

73 (si-STARD4-AS1).

| Group   | Species      |             | Sequence                      |
|---------|--------------|-------------|-------------------------------|
| Treat   | Mus musculus | SS sequence | 5'- CGAGAGAGUUUGUUGAUUUTT -3' |
| Treat   | Mus musculus | AS sequence | 5'- AAAUCAACAAACUCUCUCGTT -3' |
| Control | Mus musculus | SS sequence | 5'- UUCUCCGAACGUGUCACGUTT -3' |
| Control | Mus musculus | AS sequence | 5'- ACGUGACACGUUCGGAGAATT -3' |

74

75

76

77

78 **Supplementary table 3.** Primers for real-time quantitative polymerase chain reaction (RT-qPCR).

| Primer     | Species      |   | Sequence                       |
|------------|--------------|---|--------------------------------|
| LINC00189  | Homo sapiens | F | 5'- CAGGAAGGATGCAATTCTGGC -3'  |
| LINC00189  | Homo sapiens | R | 5'- GCAAAGGTTGCCATGCAGTC -3'   |
| LINC00861  | Homo sapiens | F | 5'- GAGCAATCCTGACCTGGGAC -3'   |
| LINC00861  | Homo sapiens | R | 5'- CGGTCTCCACTCTTGTTC -3'     |
| STARD4     | Homo sapiens | F | 5'- ACAAGTTGGCTGCTGTCCG -3'    |
| STARD4     | Homo sapiens | R | 5'- GGTGAAGCAAGGACGTGGAA -3'   |
| STARD4-AS1 | Homo sapiens | F | 5'- TCCAGCACGTATTTGTGCCA -3'   |
| STARD4-AS1 | Homo sapiens | R | 5'- CACCCCGAGGCACATTA -3'      |
| GAPDH      | Homo sapiens | F | 5'- TGACCACAGTCCATGCCATCAC -3' |
| GAPDH      | Homo sapiens | R | 5'- GCCTGCTTCACCACCTTCTTGA -3' |

79

80

81

82

83

84

85

86

87

88

89

90

91

92

93

94

95

96

97 **Supplementary table 4. The 793 differentially expressed lncRNAs between normal samples**  
 98 **and SKCM samples.**

| <b>LncRNA</b> | <b>conMean</b> | <b>treatMean</b> | <b>logFC</b> | <b>pValue</b> | <b>fdR</b> |
|---------------|----------------|------------------|--------------|---------------|------------|
| AC027307.2    | 9.54E-07       | 43.43701         | 25.44023     | 2.42E-256     | 1.05E-254  |
| AC016747.1    | 9.54E-07       | 13.73151         | 23.7788      | 2.45E-256     | 1.05E-254  |
| AC012306.2    | 9.54E-07       | 9.668116         | 23.27261     | 2.45E-256     | 1.05E-254  |
| AL359853.1    | 9.54E-07       | 9.445714         | 23.23904     | 7.77E-144     | 2.05E-143  |
| AL118506.1    | 9.54E-07       | 8.907434         | 23.15439     | 2.45E-256     | 1.05E-254  |
| AC009495.1    | 9.54E-07       | 7.521709         | 22.91044     | 2.08E-233     | 3.02E-232  |
| AC009237.14   | 9.54E-07       | 6.34011          | 22.66389     | 2.45E-256     | 1.05E-254  |
| AC090559.1    | 9.54E-07       | 5.758311         | 22.52503     | 2.46E-256     | 1.05E-254  |
| AC131254.1    | 9.54E-07       | 5.15821          | 22.36625     | 2.06E-240     | 3.32E-239  |
| AL645728.1    | 9.54E-07       | 4.877595         | 22.28555     | 2.46E-256     | 1.05E-254  |
| AC011450.1    | 9.54E-07       | 4.783322         | 22.25739     | 1.58E-255     | 6.18E-254  |
| AC017104.1    | 9.54E-07       | 4.28299          | 22.098       | 2.46E-256     | 1.05E-254  |
| U52111.1      | 9.54E-07       | 3.944766         | 21.97932     | 2.46E-256     | 1.05E-254  |
| AC011477.1    | 9.54E-07       | 3.891134         | 21.95957     | 6.55E-254     | 1.96E-252  |
| AC073046.1    | 9.54E-07       | 3.715152         | 21.8928      | 1.06E-250     | 2.30E-249  |
| AC017028.2    | 9.54E-07       | 3.696999         | 21.88573     | 4.12E-253     | 1.09E-251  |
| AL365361.1    | 9.54E-07       | 3.659409         | 21.87099     | 4.17E-253     | 1.09E-251  |
| AL928654.1    | 9.54E-07       | 3.540132         | 21.82318     | 2.46E-256     | 1.05E-254  |
| AC091057.1    | 9.54E-07       | 3.437043         | 21.78055     | 2.46E-256     | 1.05E-254  |
| AL031587.1    | 9.54E-07       | 3.410763         | 21.76947     | 2.63E-248     | 5.35E-247  |
| AL512791.1    | 9.54E-07       | 3.323344         | 21.73202     | 1.01E-246     | 1.94E-245  |
| AC004846.1    | 9.54E-07       | 3.290257         | 21.71758     | 2.46E-256     | 1.05E-254  |
| AC018690.1    | 9.54E-07       | 3.215713         | 21.68452     | 6.47E-254     | 1.96E-252  |
| AL606500.1    | 9.54E-07       | 3.210537         | 21.68219     | 1.23E-174     | 4.69E-174  |
| AL662791.1    | 9.54E-07       | 2.929518         | 21.55004     | 2.63E-248     | 5.35E-247  |
| AC017076.1    | 9.54E-07       | 2.863901         | 21.51736     | 4.56E-238     | 7.03E-237  |
| AC034236.2    | 9.54E-07       | 2.65579          | 21.40852     | 2.49E-256     | 1.05E-254  |
| AC007611.1    | 9.54E-07       | 2.586887         | 21.3706      | 2.46E-256     | 1.05E-254  |
| AC084357.2    | 9.54E-07       | 2.35296          | 21.23386     | 6.34E-246     | 1.19E-244  |
| AC114296.1    | 9.54E-07       | 2.352789         | 21.23375     | 1.16E-185     | 5.85E-185  |
| AC092275.1    | 9.54E-07       | 2.330296         | 21.21989     | 1.64E-247     | 3.21E-246  |
| AC090692.1    | 9.54E-07       | 2.326581         | 21.21759     | 1.22E-132     | 2.90E-132  |
| AC093110.1    | 9.54E-07       | 2.325102         | 21.21667     | 1.68E-251     | 3.88E-250  |
| AC024361.1    | 9.54E-07       | 2.070508         | 21.04936     | 1.68E-251     | 3.88E-250  |
| AC007773.1    | 9.54E-07       | 1.958577         | 20.96919     | 6.55E-254     | 1.96E-252  |
| AC004492.1    | 9.54E-07       | 1.901669         | 20.92665     | 1.68E-251     | 3.88E-250  |
| AC107068.1    | 9.54E-07       | 1.866316         | 20.89957     | 2.46E-256     | 1.05E-254  |
| AL596330.1    | 9.54E-07       | 1.855815         | 20.89143     | 3.00E-171     | 1.08E-170  |
| AC106771.1    | 9.54E-07       | 1.836176         | 20.87608     | 3.48E-103     | 6.61E-103  |
| AC093788.1    | 9.54E-07       | 1.728194         | 20.78865     | 9.16E-243     | 1.61E-241  |
| AC084262.1    | 9.54E-07       | 1.692268         | 20.75834     | 4.12E-253     | 1.09E-251  |

|            |          |          |          |           |           |
|------------|----------|----------|----------|-----------|-----------|
| AC099778.1 | 9.54E-07 | 1.685702 | 20.75273 | 2.46E-256 | 1.05E-254 |
| AC016727.1 | 9.54E-07 | 1.658492 | 20.72925 | 2.46E-256 | 1.05E-254 |
| FP671120.7 | 9.54E-07 | 1.594479 | 20.67246 | 2.46E-256 | 1.05E-254 |
| AC084262.2 | 9.54E-07 | 1.564958 | 20.6455  | 2.46E-256 | 1.05E-254 |
| AC092614.1 | 9.54E-07 | 1.550536 | 20.63215 | 1.06E-250 | 2.30E-249 |
| AC012181.2 | 9.54E-07 | 1.532792 | 20.61554 | 6.55E-254 | 1.96E-252 |
| AL139383.1 | 9.54E-07 | 1.513713 | 20.59747 | 6.47E-254 | 1.96E-252 |
| AC090825.1 | 9.54E-07 | 1.505809 | 20.58992 | 2.46E-256 | 1.05E-254 |
| AC009831.1 | 9.54E-07 | 1.470905 | 20.55608 | 1.58E-255 | 6.18E-254 |
| AC093157.1 | 9.54E-07 | 1.446682 | 20.53213 | 2.46E-256 | 1.05E-254 |
| AC011363.1 | 9.54E-07 | 1.443993 | 20.52944 | 6.74E-205 | 8.46E-204 |
| AL162586.1 | 9.54E-07 | 1.427357 | 20.51273 | 2.46E-256 | 1.05E-254 |
| AC141002.1 | 9.54E-07 | 1.413981 | 20.49914 | 9.16E-243 | 1.61E-241 |
| AC073370.1 | 9.54E-07 | 1.406281 | 20.49126 | 1.08E-216 | 1.41E-215 |
| AC004816.1 | 9.54E-07 | 1.401134 | 20.48597 | 2.06E-240 | 3.32E-239 |
| AL136040.1 | 9.54E-07 | 1.380161 | 20.46422 | 1.01E-254 | 3.68E-253 |
| AC026803.1 | 9.54E-07 | 1.35409  | 20.4367  | 9.05E-243 | 1.61E-241 |
| AL121655.1 | 9.54E-07 | 1.350571 | 20.43295 | 1.26E-239 | 2.01E-238 |
| AP005242.1 | 9.54E-07 | 1.324147 | 20.40444 | 5.87E-123 | 1.30E-122 |
| AC020915.1 | 9.54E-07 | 1.317596 | 20.39729 | 2.42E-244 | 4.48E-243 |
| AL442067.1 | 9.54E-07 | 1.255122 | 20.32721 | 2.84E-201 | 3.25E-200 |
| AP000787.1 | 9.54E-07 | 1.252189 | 20.32383 | 2.46E-256 | 1.05E-254 |
| AL161891.1 | 9.54E-07 | 1.247637 | 20.31858 | 2.46E-256 | 1.05E-254 |
| AC131011.1 | 9.54E-07 | 1.212596 | 20.27748 | 7.26E-232 | 1.04E-230 |
| AC145124.1 | 9.54E-07 | 1.172231 | 20.22864 | 2.63E-248 | 5.35E-247 |
| AC097639.1 | 9.54E-07 | 1.137094 | 20.18473 | 1.64E-247 | 3.21E-246 |
| AC091185.1 | 9.54E-07 | 1.128074 | 20.17324 | 2.93E-227 | 3.92E-226 |
| LINC01502  | 0.001348 | 41.61541 | 14.91403 | 3.50E-161 | 1.09E-160 |
| AC092687.3 | 0.000293 | 5.469433 | 14.19019 | 4.28E-254 | 1.50E-252 |
| BANCR      | 0.027395 | 341.4825 | 13.60562 | 3.68E-226 | 4.85E-225 |
| AC103563.7 | 0.000193 | 2.358749 | 13.58074 | 2.89E-167 | 9.85E-167 |
| AC010967.1 | 0.002509 | 15.01263 | 12.54691 | 6.35E-228 | 8.72E-227 |
| AL589986.2 | 0.000289 | 1.526645 | 12.3657  | 1.67E-203 | 1.95E-202 |
| MYCNUT     | 0.001301 | 4.251195 | 11.67413 | 1.82E-130 | 4.24E-130 |
| PLCH1-AS1  | 0.002478 | 6.70502  | 11.40187 | 4.78E-117 | 1.02E-116 |
| LINC00488  | 0.000872 | 2.275552 | 11.34887 | 8.53E-173 | 3.14E-172 |
| AC005281.1 | 0.003022 | 4.927954 | 10.67113 | 2.43E-92  | 4.29E-92  |
| AC005019.2 | 0.000881 | 1.323973 | 10.5533  | 2.99E-183 | 1.41E-182 |
| LINC00355  | 0.001392 | 1.860139 | 10.38444 | 1.08E-152 | 3.11E-152 |
| FAM230C    | 0.001323 | 1.402147 | 10.04987 | 1.96E-127 | 4.49E-127 |
| AC012506.2 | 0.001407 | 1.321996 | 9.876262 | 5.96E-96  | 1.07E-95  |
| LHFPL3-AS1 | 0.322059 | 296.785  | 9.847879 | 7.11E-151 | 1.98E-150 |
| LINC01443  | 0.160603 | 125.3642 | 9.608415 | 5.50E-100 | 1.02E-99  |
| OVAAL      | 0.007537 | 5.31763  | 9.462637 | 1.07E-115 | 2.23E-115 |

|            |          |          |          |           |           |
|------------|----------|----------|----------|-----------|-----------|
| AC009065.4 | 0.002761 | 1.824591 | 9.368251 | 8.20E-254 | 2.38E-252 |
| AC023469.1 | 0.004352 | 2.848369 | 9.354404 | 1.21E-145 | 3.23E-145 |
| LINC01518  | 0.002816 | 1.683512 | 9.223538 | 1.03E-154 | 3.03E-154 |
| LINC00221  | 0.006451 | 3.771836 | 9.191615 | 3.02E-125 | 6.75E-125 |
| LINC00456  | 0.007621 | 4.347253 | 9.155925 | 3.88E-187 | 2.06E-186 |
| AF131215.6 | 0.008508 | 4.152972 | 8.931033 | 2.74E-241 | 4.73E-240 |
| AC112220.2 | 0.006624 | 2.921508 | 8.7847   | 1.08E-251 | 2.68E-250 |
| LINC00518  | 0.344153 | 142.4099 | 8.692785 | 3.21E-177 | 1.27E-176 |
| AC017074.1 | 0.00448  | 1.804075 | 8.653389 | 9.10E-241 | 1.52E-239 |
| LINC01474  | 0.103604 | 41.59326 | 8.649124 | 6.22E-70  | 9.46E-70  |
| LINC00698  | 0.007695 | 2.955076 | 8.585068 | 1.12E-115 | 2.32E-115 |
| AC079807.1 | 0.004127 | 1.575933 | 8.576953 | 1.84E-252 | 4.67E-251 |
| LINC01036  | 0.003451 | 1.308081 | 8.566206 | 2.11E-235 | 3.11E-234 |
| HPN-AS1    | 0.033356 | 10.95775 | 8.359772 | 4.72E-142 | 1.22E-141 |
| AC021078.1 | 0.007256 | 2.277799 | 8.294294 | 8.13E-255 | 3.06E-253 |
| DSCR8      | 0.028832 | 9.027098 | 8.290446 | 4.26E-73  | 6.56E-73  |
| LINC01293  | 0.066736 | 18.55044 | 8.118769 | 3.37E-165 | 1.12E-164 |
| LINC00589  | 0.070971 | 19.67301 | 8.114765 | 2.26E-151 | 6.36E-151 |
| LINC00322  | 0.011691 | 2.965944 | 7.987003 | 8.69E-123 | 1.92E-122 |
| AC015726.1 | 0.02028  | 5.121552 | 7.980396 | 4.12E-241 | 6.98E-240 |
| LINC00520  | 0.28554  | 71.82386 | 7.974624 | 4.36E-110 | 8.72E-110 |
| AC073409.1 | 0.023928 | 5.655755 | 7.884891 | 1.66E-125 | 3.74E-125 |
| LINC01034  | 0.005555 | 1.109215 | 7.641576 | 7.90E-169 | 2.72E-168 |
| AC020915.2 | 0.018596 | 3.662342 | 7.621618 | 1.74E-227 | 2.36E-226 |
| LINC00052  | 0.013638 | 2.684934 | 7.621091 | 4.75E-78  | 7.57E-78  |
| HCCAT5     | 0.00847  | 1.641066 | 7.597988 | 5.04E-177 | 1.99E-176 |
| ELFN1-AS1  | 0.112701 | 21.36944 | 7.56691  | 1.78E-97  | 3.26E-97  |
| AC083843.2 | 0.046153 | 8.169656 | 7.46771  | 1.45E-207 | 1.85E-206 |
| LINC01531  | 0.045039 | 7.732987 | 7.423714 | 3.65E-99  | 6.74E-99  |
| THCAT158   | 0.209648 | 32.08957 | 7.257992 | 2.04E-157 | 6.20E-157 |
| AC074290.1 | 0.016586 | 2.361641 | 7.153695 | 7.74E-145 | 2.05E-144 |
| LINC00326  | 0.009976 | 1.242638 | 6.960702 | 1.70E-120 | 3.72E-120 |
| LINC00920  | 0.426908 | 48.20671 | 6.819165 | 2.31E-186 | 1.19E-185 |
| AC021087.1 | 0.025865 | 2.913305 | 6.815484 | 3.55E-253 | 1.00E-251 |
| MNX1-AS1   | 0.025484 | 2.711405 | 6.733318 | 4.67E-82  | 7.76E-82  |
| LINC00645  | 0.013926 | 1.461043 | 6.713072 | 6.12E-42  | 8.01E-42  |
| PIK3CD-AS2 | 0.95788  | 92.23352 | 6.589302 | 2.61E-192 | 1.68E-191 |
| AC007391.2 | 0.051747 | 4.66348  | 6.493776 | 9.58E-154 | 2.78E-153 |
| AP000439.2 | 0.020617 | 1.805892 | 6.452768 | 3.87E-45  | 5.20E-45  |
| TRBV11-2   | 0.041569 | 3.633314 | 6.449628 | 3.49E-143 | 9.07E-143 |
| HCG20      | 0.12374  | 10.18721 | 6.363307 | 2.18E-145 | 5.79E-145 |
| AC097359.2 | 0.162387 | 12.55272 | 6.272417 | 8.90E-199 | 9.33E-198 |
| ROR1-AS1   | 0.067806 | 5.07285  | 6.225234 | 4.03E-52  | 5.60E-52  |
| FEZF1-AS1  | 0.018491 | 1.290369 | 6.12485  | 2.29E-57  | 3.29E-57  |



|             |          |          |          |           |           |
|-------------|----------|----------|----------|-----------|-----------|
| AP000696.2  | 0.022747 | 1.517497 | 6.059885 | 5.14E-54  | 7.23E-54  |
| LINC01505   | 0.017054 | 1.131634 | 6.052139 | 1.48E-195 | 1.42E-194 |
| FOXD3-AS1   | 0.830788 | 53.01395 | 5.995748 | 3.79E-185 | 1.86E-184 |
| AC112721.1  | 0.115137 | 6.619204 | 5.84524  | 2.59E-83  | 4.35E-83  |
| LINC01320   | 0.063571 | 3.638367 | 5.838769 | 8.68E-101 | 1.62E-100 |
| CASC9       | 0.022201 | 1.254419 | 5.820279 | 3.24E-90  | 5.67E-90  |
| PCAT7       | 0.039136 | 2.198754 | 5.812058 | 1.30E-109 | 2.58E-109 |
| AC008991.1  | 0.123946 | 6.643949 | 5.744252 | 1.42E-81  | 2.34E-81  |
| LINC01215   | 0.043057 | 2.300857 | 5.739771 | 2.46E-56  | 3.51E-56  |
| AP002381.2  | 0.047519 | 2.519745 | 5.728622 | 5.13E-214 | 6.61E-213 |
| LINC01447   | 0.077479 | 4.069912 | 5.71504  | 9.29E-08  | 9.95E-08  |
| AL589843.1  | 0.022545 | 1.168504 | 5.695738 | 7.81E-251 | 1.77E-249 |
| AC011239.1  | 0.058273 | 2.861381 | 5.617729 | 1.85E-38  | 2.38E-38  |
| AL021807.1  | 0.104685 | 4.863075 | 5.537749 | 8.76E-237 | 1.31E-235 |
| FLJ16779    | 0.091023 | 4.132313 | 5.504573 | 3.54E-69  | 5.35E-69  |
| AC009495.2  | 0.171251 | 7.703962 | 5.491416 | 4.76E-151 | 1.33E-150 |
| AL049794.1  | 0.024198 | 1.064514 | 5.459137 | 1.23E-177 | 4.96E-177 |
| LINC00681   | 1.59893  | 69.0017  | 5.431453 | 9.71E-79  | 1.56E-78  |
| RHPN1-AS1   | 0.269536 | 11.07395 | 5.360546 | 3.22E-194 | 2.43E-193 |
| HAGLR       | 0.919272 | 37.76821 | 5.360537 | 3.01E-172 | 1.10E-171 |
| LBX2-AS1    | 2.356988 | 90.2023  | 5.258148 | 5.67E-189 | 3.17E-188 |
| LINC01597   | 0.038511 | 1.458239 | 5.242803 | 8.38E-100 | 1.56E-99  |
| KIF25-AS1   | 0.039208 | 1.412794 | 5.171246 | 1.22E-07  | 1.31E-07  |
| AC104532.2  | 0.127256 | 4.398267 | 5.111135 | 4.31E-199 | 4.66E-198 |
| LINC01143   | 0.048058 | 1.587117 | 5.045484 | 9.45E-134 | 2.29E-133 |
| AC016735.1  | 0.048666 | 1.599299 | 5.038378 | 9.83E-81  | 1.61E-80  |
| LINC00622   | 0.8644   | 27.78862 | 5.006651 | 2.30E-182 | 1.04E-181 |
| OSTN-AS1    | 0.033092 | 1.063654 | 5.006383 | 3.48E-90  | 6.07E-90  |
| CCDC140     | 0.11393  | 3.611757 | 4.986477 | 6.57E-182 | 2.92E-181 |
| TRPM2-AS    | 0.192344 | 6.076412 | 4.981461 | 2.98E-73  | 4.60E-73  |
| AC112721.2  | 0.290029 | 8.96567  | 4.950145 | 1.18E-80  | 1.93E-80  |
| HAGLROS     | 0.260317 | 8.024718 | 4.946109 | 1.54E-133 | 3.71E-133 |
| ALG13-AS1   | 0.050059 | 1.437547 | 4.843837 | 1.92E-178 | 7.99E-178 |
| AC003956.1  | 0.067772 | 1.920363 | 4.824539 | 3.64E-176 | 1.42E-175 |
| EWSAT1      | 0.179231 | 4.902501 | 4.773626 | 5.78E-108 | 1.13E-107 |
| LINC01234   | 0.075069 | 2.037536 | 4.76246  | 1.20E-133 | 2.90E-133 |
| ZFPM2-AS1   | 0.345192 | 9.074111 | 4.716287 | 8.18E-81  | 1.34E-80  |
| KCNH1-IT1   | 0.046963 | 1.225662 | 4.705904 | 6.53E-81  | 1.07E-80  |
| LINC00462   | 0.607389 | 15.00783 | 4.626951 | 2.63E-35  | 3.32E-35  |
| L3MBTL4-AS1 | 0.048683 | 1.174325 | 4.592272 | 3.36E-154 | 9.86E-154 |
| AC135050.5  | 0.079735 | 1.918344 | 4.588505 | 2.25E-197 | 2.31E-196 |
| FOXD2-AS1   | 1.19627  | 28.47169 | 4.572912 | 3.69E-183 | 1.74E-182 |
| LINC00189   | 0.278941 | 6.621585 | 4.569143 | 1.89E-22  | 2.25E-22  |
| LINC01611   | 0.043518 | 1.02493  | 4.557756 | 5.64E-49  | 7.74E-49  |

|               |          |          |          |            |             |
|---------------|----------|----------|----------|------------|-------------|
| LINC01444     | 0.099784 | 2.307208 | 4.531199 | 1.70E-74   | 2.66E-74    |
| LINC01411     | 0.093383 | 2.083887 | 4.47998  | 2.45E-22   | 2.91E-22    |
| FAM222A-AS1   | 0.092629 | 2.043531 | 4.463449 | 5.56E-146  | 1.50E-145   |
| MGC16275      | 0.380839 | 7.867947 | 4.368732 | 6.24E-157  | 1.89E-156   |
| SUCLA2-AS1    | 0.117235 | 2.391339 | 4.350348 | 5.59E-194  | 4.12E-193   |
| AC093484.4    | 0.183629 | 3.679233 | 4.324543 | 1.44E-181  | 6.35E-181   |
| LINC01366     | 0.201063 | 4.007257 | 4.316896 | 1.16E-173  | 4.33E-173   |
| LINC00996     | 0.059831 | 1.154381 | 4.27009  | 1.76E-105  | 3.39E-105   |
| AC092652.1    | 0.098897 | 1.891048 | 4.257118 | 2.33E-34   | 2.92E-34    |
| EPHA5-AS1     | 0.084104 | 1.599266 | 4.249095 | 1.92E-93   | 3.41E-93    |
| LINC01556     | 0.059849 | 1.110382 | 4.213575 | 5.49E-115  | 1.14E-114   |
| AC061992.2    | 0.188675 | 3.316387 | 4.135636 | 3.72E-147  | 1.01E-146   |
| GAPLINC       | 1.280479 | 21.73119 | 4.085011 | 6.93E-149  | 1.88E-148   |
| LINC01050     | 0.120973 | 2.043997 | 4.07864  | 3.00E-88   | 5.22E-88    |
| LINC01352     | 0.133344 | 2.252201 | 4.078114 | 2.51E-129  | 5.83E-129   |
| AC096921.2    | 0.067985 | 1.110463 | 4.029804 | 2.29E-190  | 1.35E-189   |
| ATP6V0E2-AS1  | 0.414472 | 6.768027 | 4.02939  | 2.83E-186  | 1.44E-185   |
| LINC01010     | 0.158381 | 2.466656 | 3.961083 | 2.57E-38   | 3.30E-38    |
| AL590764.1    | 0.116133 | 1.750069 | 3.913559 | 5.82E-237  | 8.84E-236   |
| NFIA-AS2      | 0.096499 | 1.423523 | 3.882815 | 7.93E-108  | 1.54E-107   |
| LINC01389     | 0.134711 | 1.97563  | 3.87437  | 2.21E-134  | 5.37E-134   |
| DNM1P35       | 0.157148 | 2.303647 | 3.873721 | 1.90E-132  | 4.50E-132   |
| NBAT1         | 0.087139 | 1.248714 | 3.84098  | 9.43E-121  | 2.06E-120   |
| CH17-340M24.3 | 4.019179 | 55.99788 | 3.8004   | 3.99E-191  | 2.40E-190   |
| SLCO4A1-AS1   | 5.283304 | 73.10258 | 3.79041  | 5.89E-72   | 9.04E-72    |
| AC004637.1    | 0.09093  | 1.251821 | 3.783136 | 0.00015947 | 0.000165491 |
| MIR155HG      | 0.875446 | 12.03196 | 3.780709 | 8.58E-58   | 1.24E-57    |
| ST3GAL5-AS1   | 0.270693 | 3.698738 | 3.772302 | 2.56E-164  | 8.24E-164   |
| TFAP2A-AS1    | 1.430393 | 19.12483 | 3.740963 | 7.95E-133  | 1.89E-132   |
| LINC00973     | 0.393243 | 5.221596 | 3.730998 | 1.85E-86   | 3.21E-86    |
| LINC00337     | 0.099534 | 1.312742 | 3.721253 | 9.12E-129  | 2.11E-128   |
| LINC00237     | 0.092992 | 1.186604 | 3.673595 | 8.06E-13   | 8.90E-13    |
| LEF1-AS1      | 0.251738 | 3.10786  | 3.625926 | 1.00E-104  | 1.92E-104   |
| LINC01563     | 0.221101 | 2.713125 | 3.617181 | 4.79E-82   | 7.95E-82    |
| LINC01587     | 0.088929 | 1.055629 | 3.569299 | 2.28E-47   | 3.08E-47    |
| ST3GAL6-AS1   | 0.515468 | 6.065133 | 3.556584 | 2.77E-168  | 9.52E-168   |
| LINC00861     | 0.114232 | 1.337906 | 3.549935 | 1.59E-36   | 2.01E-36    |
| LYPLAL1-AS1   | 0.125868 | 1.456646 | 3.532668 | 1.66E-24   | 2.00E-24    |
| ACVR2B-AS1    | 0.513016 | 5.808103 | 3.500991 | 7.58E-154  | 2.21E-153   |
| AC006538.1    | 0.371767 | 4.167274 | 3.486634 | 7.09E-164  | 2.27E-163   |
| LINC01102     | 0.12343  | 1.30966  | 3.407425 | 1.26E-51   | 1.75E-51    |
| LINC00239     | 0.357509 | 3.776018 | 3.400815 | 9.95E-76   | 1.56E-75    |
| LINC00853     | 0.357617 | 3.657189 | 3.354247 | 3.45E-135  | 8.43E-135   |
| FOXP4-AS1     | 0.398942 | 3.942169 | 3.304738 | 6.00E-133  | 1.43E-132   |

|              |          |          |          |             |             |
|--------------|----------|----------|----------|-------------|-------------|
| AGBL5-IT1    | 0.29849  | 2.884229 | 3.272431 | 9.72E-180   | 4.12E-179   |
| PDCD4-AS1    | 1.798127 | 17.33418 | 3.269052 | 1.49E-192   | 9.92E-192   |
| AC010642.2   | 0.13029  | 1.235552 | 3.245359 | 1.95E-193   | 1.40E-192   |
| TSPEAR-AS2   | 0.3347   | 3.164563 | 3.241065 | 0.001327208 | 0.001363405 |
| AC008906.1   | 0.127393 | 1.171404 | 3.200883 | 4.96E-230   | 7.00E-229   |
| LINC00896    | 0.17551  | 1.572515 | 3.163452 | 9.43E-74    | 1.46E-73    |
| AC079922.2   | 0.582358 | 5.210686 | 3.161495 | 4.12E-167   | 1.40E-166   |
| AC090673.1   | 0.342639 | 3.062794 | 3.160085 | 6.67E-180   | 2.84E-179   |
| PRRT3-AS1    | 1.829143 | 16.26405 | 3.152446 | 6.27E-139   | 1.57E-138   |
| AL009179.1   | 0.183842 | 1.631235 | 3.149425 | 1.03E-177   | 4.17E-177   |
| BAALC-AS2    | 0.309679 | 2.720603 | 3.135082 | 8.11E-83    | 1.35E-82    |
| CARD8-AS1    | 0.870304 | 7.540881 | 3.115142 | 1.37E-175   | 5.29E-175   |
| SATB2-AS1    | 0.18788  | 1.624439 | 3.112059 | 2.92E-149   | 7.95E-149   |
| LINC01063    | 0.298257 | 2.577273 | 3.111217 | 2.32E-140   | 5.87E-140   |
| LINC01480    | 0.657816 | 5.544488 | 3.075298 | 4.06E-69    | 6.13E-69    |
| ETV5-AS1     | 0.231294 | 1.936121 | 3.065372 | 3.58E-114   | 7.36E-114   |
| USP12-AS2    | 0.153811 | 1.272922 | 3.048913 | 1.99E-96    | 3.61E-96    |
| FGD5-AS1     | 37.47693 | 307.8664 | 3.03823  | 3.12E-160   | 9.67E-160   |
| AC003092.1   | 1.457684 | 11.92038 | 3.03168  | 5.47E-53    | 7.64E-53    |
| LINC01291    | 0.835178 | 6.796711 | 3.024682 | 3.20E-85    | 5.47E-85    |
| AF186192.1   | 0.291425 | 2.304517 | 2.983268 | 3.12E-14    | 3.49E-14    |
| ARHGAP5-AS1  | 2.358676 | 18.47909 | 2.969844 | 1.68E-174   | 6.35E-174   |
| SERPINB9P1   | 0.436449 | 3.405292 | 2.963894 | 1.26E-62    | 1.86E-62    |
| LINC00906    | 0.149342 | 1.162038 | 2.959964 | 3.12E-10    | 3.38E-10    |
| OCIAD1-AS1   | 0.229631 | 1.775194 | 2.950586 | 1.50E-143   | 3.92E-143   |
| SOS1-IT1     | 0.668455 | 5.141456 | 2.943276 | 4.44E-172   | 1.62E-171   |
| LINC00460    | 0.26966  | 2.060546 | 2.933811 | 9.46E-19    | 1.09E-18    |
| DBH-AS1      | 0.403905 | 3.051997 | 2.917667 | 9.70E-57    | 1.39E-56    |
| SMARCA5-AS1  | 0.163711 | 1.233565 | 2.913609 | 1.26E-141   | 3.21E-141   |
| LINC00638    | 0.417348 | 3.078419 | 2.882866 | 1.27E-155   | 3.78E-155   |
| HCG11        | 3.123456 | 22.35381 | 2.839306 | 1.44E-85    | 2.47E-85    |
| TMPO-AS1     | 0.484399 | 3.452322 | 2.833298 | 7.34E-170   | 2.57E-169   |
| LINC01116    | 4.899387 | 34.60989 | 2.820511 | 9.69E-107   | 1.88E-106   |
| ERICD        | 0.335451 | 2.3577   | 2.813205 | 2.99E-163   | 9.52E-163   |
| AC009495.3   | 0.206747 | 1.381732 | 2.740537 | 3.11E-74    | 4.83E-74    |
| ANKRD10-IT1  | 6.768831 | 45.0509  | 2.734577 | 2.58E-96    | 4.67E-96    |
| ZNF197-AS1   | 0.147383 | 0.968391 | 2.716019 | 1.39E-111   | 2.81E-111   |
| HCG15        | 0.304293 | 1.996753 | 2.714125 | 4.49E-120   | 9.74E-120   |
| ARHGAP31-AS1 | 0.354405 | 2.271824 | 2.680381 | 8.23E-150   | 2.26E-149   |
| AC064836.3   | 0.234247 | 1.500125 | 2.678982 | 1.60E-127   | 3.67E-127   |
| GLIS2-AS1    | 0.490821 | 3.128853 | 2.672365 | 2.68E-74    | 4.17E-74    |
| LINC00839    | 1.08473  | 6.88224  | 2.665543 | 2.24E-49    | 3.08E-49    |
| BOLA3-AS1    | 1.666576 | 10.56509 | 2.664346 | 6.59E-157   | 1.99E-156   |
| LINC00997    | 1.323582 | 8.343439 | 2.656195 | 9.60E-182   | 4.25E-181   |

|              |          |          |          |             |             |
|--------------|----------|----------|----------|-------------|-------------|
| LOH12CR2     | 0.62199  | 3.823545 | 2.619948 | 4.28E-168   | 1.46E-167   |
| PRSS30P      | 0.402026 | 2.455754 | 2.610806 | 0.002491387 | 0.002554173 |
| A2M-AS1      | 0.63454  | 3.778437 | 2.574008 | 5.58E-85    | 9.50E-85    |
| ZBTB11-AS1   | 1.173    | 6.977696 | 2.572548 | 9.48E-189   | 5.27E-188   |
| LINC00323    | 0.435881 | 2.546444 | 2.546476 | 3.67E-42    | 4.82E-42    |
| LINC01521    | 0.84634  | 4.920487 | 2.539491 | 2.48E-143   | 6.46E-143   |
| SEMA3B-AS1   | 0.486978 | 2.811525 | 2.529425 | 3.23E-55    | 4.57E-55    |
| PCED1B-AS1   | 1.424377 | 8.102831 | 2.508095 | 6.02E-40    | 7.79E-40    |
| AC007389.3   | 0.198403 | 1.104572 | 2.476979 | 4.73E-50    | 6.53E-50    |
| KMT2E-AS1    | 3.947146 | 21.61667 | 2.453263 | 6.39E-179   | 2.66E-178   |
| LINC00205    | 2.571261 | 13.96066 | 2.440819 | 5.39E-167   | 1.82E-166   |
| LINC00482    | 0.636857 | 3.434843 | 2.431202 | 3.27E-32    | 4.05E-32    |
| TBX2-AS1     | 2.783237 | 14.82262 | 2.412965 | 1.93E-116   | 4.06E-116   |
| NNT-AS1      | 2.955067 | 15.71029 | 2.410446 | 3.85E-156   | 1.16E-155   |
| HHLA3        | 8.904371 | 46.59729 | 2.38766  | 1.48E-137   | 3.68E-137   |
| AGAP1-IT1    | 0.20318  | 1.057383 | 2.379667 | 2.66E-57    | 3.81E-57    |
| LINC00987    | 0.463683 | 2.378452 | 2.358813 | 3.98E-16    | 4.50E-16    |
| URB1-AS1     | 6.567856 | 33.51782 | 2.351434 | 7.23E-173   | 2.67E-172   |
| OGFRP1       | 0.322136 | 1.64183  | 2.349562 | 2.19E-155   | 6.49E-155   |
| LINC01220    | 0.23518  | 1.195406 | 2.345663 | 9.23E-122   | 2.03E-121   |
| TRG-AS1      | 0.275419 | 1.395407 | 2.340986 | 9.96E-33    | 1.24E-32    |
| ATP2A1-AS1   | 0.982788 | 4.877654 | 2.311236 | 1.24E-107   | 2.42E-107   |
| PSMG3-AS1    | 2.883514 | 14.27594 | 2.307686 | 7.16E-104   | 1.36E-103   |
| CLDN10-AS1   | 0.280958 | 1.377675 | 2.293812 | 9.43E-09    | 1.02E-08    |
| LINC00426    | 0.624301 | 3.015029 | 2.271858 | 5.83E-31    | 7.15E-31    |
| NKILA        | 0.364442 | 1.757536 | 2.269791 | 5.35E-12    | 5.89E-12    |
| PCAT6        | 9.224441 | 44.0269  | 2.254852 | 6.48E-109   | 1.28E-108   |
| AC099850.1   | 0.806384 | 3.82176  | 2.244698 | 1.42E-162   | 4.49E-162   |
| GAS5-AS1     | 1.032289 | 4.83161  | 2.226657 | 2.06E-174   | 7.75E-174   |
| DLGAP1-AS2   | 1.597275 | 7.455251 | 2.222644 | 3.57E-121   | 7.83E-121   |
| EXOC3-AS1    | 3.164663 | 14.65672 | 2.211439 | 6.06E-165   | 2.00E-164   |
| UPK1A-AS1    | 0.484344 | 2.237225 | 2.207606 | 2.34E-20    | 2.73E-20    |
| SNHG6        | 123.9086 | 563.2246 | 2.184434 | 1.20E-170   | 4.27E-170   |
| LURAP1L-AS1  | 0.232629 | 1.043578 | 2.165435 | 8.12E-20    | 9.43E-20    |
| AC144652.1   | 1.477716 | 6.596118 | 2.158249 | 3.14E-142   | 8.12E-142   |
| AC156455.1   | 1.362329 | 6.060378 | 2.153332 | 4.99E-65    | 7.44E-65    |
| AC062029.1   | 0.676104 | 2.984531 | 2.142187 | 1.16E-136   | 2.87E-136   |
| CTB-178M22.2 | 0.370272 | 1.633363 | 2.141188 | 1.26E-07    | 1.34E-07    |
| FOXN3-AS1    | 2.146279 | 9.44092  | 2.13709  | 1.61E-128   | 3.73E-128   |
| LINC01560    | 1.950522 | 8.536504 | 2.129785 | 8.22E-183   | 3.82E-182   |
| HM13-IT1     | 0.701909 | 3.071409 | 2.129545 | 1.62E-126   | 3.69E-126   |
| USP30-AS1    | 0.253416 | 1.095341 | 2.111798 | 4.83E-16    | 5.45E-16    |
| ST8SIA6-AS1  | 0.288216 | 1.243257 | 2.108905 | 2.38E-59    | 3.45E-59    |
| FLJ37453     | 1.512047 | 6.462653 | 2.095624 | 7.65E-178   | 3.11E-177   |



|              |          |          |          |             |             |
|--------------|----------|----------|----------|-------------|-------------|
| HAR1A        | 0.328916 | 1.385693 | 2.074817 | 0.000789824 | 0.000813831 |
| C1orf229     | 0.230307 | 0.968517 | 2.072218 | 1.22E-40    | 1.59E-40    |
| LINC00539    | 0.283165 | 1.183898 | 2.063829 | 4.94E-162   | 1.56E-161   |
| WAC-AS1      | 8.163877 | 34.01632 | 2.058901 | 1.58E-174   | 5.98E-174   |
| DLGAP1-AS1   | 5.056698 | 20.68649 | 2.032422 | 6.68E-109   | 1.32E-108   |
| XXYLT1-AS2   | 0.262441 | 1.069966 | 2.027503 | 4.73E-49    | 6.50E-49    |
| LINC01023    | 4.443956 | 18.05867 | 2.022775 | 2.29E-114   | 4.72E-114   |
| AC025171.1   | 1.220469 | 4.935777 | 2.015841 | 3.45E-149   | 9.38E-149   |
| LINC01003    | 3.49168  | 13.9905  | 2.002454 | 2.07E-152   | 5.92E-152   |
| LINC01198    | 0.694549 | 2.76568  | 1.993485 | 5.06E-26    | 6.11E-26    |
| PLS3-AS1     | 0.337308 | 1.325668 | 1.974579 | 7.59E-77    | 1.20E-76    |
| AC093382.1   | 0.4458   | 1.718355 | 1.94656  | 1.47E-75    | 2.30E-75    |
| AL513327.1   | 0.42347  | 1.62063  | 1.936223 | 3.49E-238   | 5.46E-237   |
| OIP5-AS1     | 16.83807 | 64.36897 | 1.934639 | 4.39E-126   | 9.91E-126   |
| MIR181A2HG   | 1.040601 | 3.941641 | 1.921379 | 8.00E-70    | 1.21E-69    |
| FBXL19-AS1   | 0.599284 | 2.251607 | 1.909643 | 3.94E-130   | 9.18E-130   |
| BACH1-IT1    | 0.275317 | 1.019002 | 1.887991 | 1.97E-76    | 3.11E-76    |
| TRAPPC12-AS1 | 0.829211 | 3.049063 | 1.878555 | 1.63E-97    | 3.00E-97    |
| HEXA-AS1     | 0.249416 | 0.91685  | 1.878131 | 1.29E-69    | 1.95E-69    |
| IDH1-AS1     | 0.833822 | 3.046928 | 1.869545 | 5.23E-83    | 8.74E-83    |
| TMEM44-AS1   | 2.320114 | 8.45541  | 1.865679 | 9.70E-172   | 3.52E-171   |
| UBAC2-AS1    | 0.662414 | 2.397781 | 1.855896 | 2.88E-125   | 6.47E-125   |
| AC022098.1   | 0.660491 | 2.381771 | 1.850424 | 2.06E-228   | 2.87E-227   |
| TONSL-AS1    | 0.433286 | 1.532994 | 1.82296  | 8.62E-85    | 1.46E-84    |
| VPS9D1-AS1   | 3.7527   | 13.19402 | 1.813883 | 1.30E-47    | 1.77E-47    |
| HMGA1P4      | 0.36826  | 1.288658 | 1.807075 | 2.86E-61    | 4.20E-61    |
| CCDC13-AS1   | 0.286571 | 0.977048 | 1.769536 | 1.17E-29    | 1.42E-29    |
| MIS18A-AS1   | 0.214903 | 0.732378 | 1.768904 | 5.31E-101   | 9.96E-101   |
| LPP-AS2      | 1.224868 | 4.159762 | 1.763875 | 2.30E-117   | 4.92E-117   |
| RASAL2-AS1   | 0.776724 | 2.636121 | 1.762942 | 3.45E-98    | 6.33E-98    |
| YTHDF3-AS1   | 2.025592 | 6.861892 | 1.760263 | 1.68E-119   | 3.62E-119   |
| LINC00327    | 0.767934 | 2.593484 | 1.755837 | 1.15E-29    | 1.41E-29    |
| PRR34        | 0.351296 | 1.18382  | 1.752689 | 1.01E-105   | 1.95E-105   |
| ST20-AS1     | 1.705122 | 5.73659  | 1.750318 | 1.70E-126   | 3.86E-126   |
| CASC15       | 0.832202 | 2.790722 | 1.745633 | 4.69E-42    | 6.16E-42    |
| AP001372.2   | 2.226703 | 7.226111 | 1.69831  | 5.81E-135   | 1.42E-134   |
| GS1-124K5.4  | 3.274162 | 10.59853 | 1.694666 | 3.32E-104   | 6.33E-104   |
| ALMS1-IT1    | 0.573592 | 1.855927 | 1.694043 | 5.21E-72    | 8.01E-72    |
| PAN3-AS1     | 1.226121 | 3.953654 | 1.689085 | 3.00E-119   | 6.44E-119   |
| BRWD1-AS2    | 0.576334 | 1.850617 | 1.683031 | 6.56E-86    | 1.13E-85    |
| ARIH2OS      | 1.660812 | 5.311628 | 1.677265 | 1.31E-155   | 3.91E-155   |
| ZNF503-AS2   | 1.499696 | 4.776255 | 1.671209 | 6.07E-111   | 1.22E-110   |
| SP2-AS1      | 1.14894  | 3.62347  | 1.657069 | 1.74E-108   | 3.43E-108   |
| LINC01117    | 0.601515 | 1.889117 | 1.65104  | 9.40E-61    | 1.38E-60    |

|              |          |          |          |             |             |
|--------------|----------|----------|----------|-------------|-------------|
| IDI2-AS1     | 0.814547 | 2.535848 | 1.638398 | 6.57E-64    | 9.74E-64    |
| VIM-AS1      | 1.271256 | 3.948325 | 1.634986 | 2.96E-98    | 5.44E-98    |
| CHL1-AS1     | 0.230799 | 0.710799 | 1.622807 | 2.98E-20    | 3.48E-20    |
| LINC00324    | 1.536862 | 4.702198 | 1.613348 | 1.21E-79    | 1.96E-79    |
| AC008982.2   | 0.672674 | 2.057339 | 1.612801 | 3.88E-65    | 5.81E-65    |
| SNHG19       | 72.68274 | 221.672  | 1.608742 | 3.56E-38    | 4.55E-38    |
| AC253576.2   | 0.232038 | 0.70634  | 1.605999 | 1.25E-196   | 1.26E-195   |
| LINC01235    | 0.791601 | 2.392608 | 1.595739 | 7.55E-19    | 8.70E-19    |
| PRKAG2-AS1   | 2.796659 | 8.42652  | 1.591233 | 2.68E-24    | 3.21E-24    |
| SNHG4        | 5.330879 | 16.02487 | 1.587867 | 5.07E-57    | 7.25E-57    |
| USP27X-AS1   | 0.695682 | 2.067596 | 1.571455 | 5.62E-150   | 1.55E-149   |
| LINC00294    | 5.412315 | 16.08432 | 1.571337 | 2.28E-150   | 6.31E-150   |
| PAXIP1-AS1   | 6.403235 | 18.94989 | 1.565316 | 8.69E-140   | 2.18E-139   |
| AC009961.3   | 0.831881 | 2.361836 | 1.50546  | 1.44E-39    | 1.85E-39    |
| HLA-DQB1-AS1 | 1.820508 | 5.161743 | 1.503517 | 3.90E-11    | 4.27E-11    |
| FGF14-AS2    | 2.349179 | 6.584003 | 1.486808 | 8.72E-25    | 1.05E-24    |
| LINC01058    | 0.278124 | 0.775653 | 1.479686 | 3.37E-24    | 4.03E-24    |
| PRR26        | 0.319518 | 0.888843 | 1.476032 | 0.001739886 | 0.001785534 |
| TAF1A-AS1    | 0.980365 | 2.719319 | 1.471854 | 1.66E-101   | 3.13E-101   |
| FMR1-IT1     | 0.475327 | 1.316722 | 1.46996  | 1.07E-45    | 1.44E-45    |
| HLX-AS1      | 0.420014 | 1.142429 | 1.443594 | 1.52E-14    | 1.70E-14    |
| LINC00467    | 2.431646 | 6.593495 | 1.43911  | 1.06E-109   | 2.11E-109   |
| AL133243.2   | 1.170227 | 3.172913 | 1.43902  | 1.08E-89    | 1.87E-89    |
| WDR86-AS1    | 0.294391 | 0.797866 | 1.438412 | 7.22E-15    | 8.10E-15    |
| AC009506.1   | 1.255494 | 3.320998 | 1.403362 | 5.69E-102   | 1.08E-101   |
| LINC00235    | 0.538323 | 1.420842 | 1.400201 | 1.17E-42    | 1.54E-42    |
| FAM225A      | 0.702489 | 1.853212 | 1.399481 | 4.15E-27    | 5.03E-27    |
| DGCR11       | 1.765069 | 4.649175 | 1.39725  | 2.41E-84    | 4.06E-84    |
| JARID2-AS1   | 0.328572 | 0.860499 | 1.388963 | 2.73E-37    | 3.47E-37    |
| LINC01004    | 2.419395 | 6.307633 | 1.382452 | 2.45E-58    | 3.53E-58    |
| CEBPB-AS1    | 0.630193 | 1.639807 | 1.37966  | 1.44E-76    | 2.28E-76    |
| RBPMS-AS1    | 1.198658 | 3.11331  | 1.37703  | 1.30E-34    | 1.63E-34    |
| CHL1-AS2     | 0.557909 | 1.435084 | 1.363033 | 5.78E-18    | 6.60E-18    |
| RARA-AS1     | 1.45364  | 3.72588  | 1.357911 | 8.95E-95    | 1.61E-94    |
| CIRBP-AS1    | 1.723901 | 4.33375  | 1.329939 | 3.82E-100   | 7.12E-100   |
| TRIM52-AS1   | 13.28432 | 33.35112 | 1.328011 | 6.72E-101   | 1.26E-100   |
| AL157871.2   | 2.050402 | 5.121784 | 1.32074  | 8.47E-20    | 9.82E-20    |
| NRAV         | 4.408626 | 10.99101 | 1.317923 | 1.20E-143   | 3.15E-143   |
| TMCC1-AS1    | 1.388941 | 3.451797 | 1.313363 | 3.51E-66    | 5.26E-66    |
| FLJ20021     | 9.936491 | 24.28279 | 1.289126 | 5.51E-70    | 8.39E-70    |
| PRKAR2A-AS1  | 0.524661 | 1.273618 | 1.279474 | 2.38E-63    | 3.51E-63    |
| EP300-AS1    | 0.762822 | 1.839776 | 1.270113 | 5.81E-45    | 7.78E-45    |
| TNKS2-AS1    | 0.989115 | 2.373444 | 1.262772 | 1.43E-43    | 1.91E-43    |
| PRR7-AS1     | 1.337965 | 3.194674 | 1.255629 | 6.97E-56    | 9.88E-56    |

|              |          |          |          |           |           |
|--------------|----------|----------|----------|-----------|-----------|
| LINC00526    | 1.719093 | 4.066776 | 1.242238 | 2.35E-113 | 4.80E-113 |
| TOLLIP-AS1   | 2.31396  | 5.468431 | 1.240763 | 8.26E-55  | 1.17E-54  |
| GCC2-AS1     | 0.340328 | 0.803904 | 1.240097 | 2.53E-56  | 3.60E-56  |
| UGDH-AS1     | 0.723735 | 1.70499  | 1.23623  | 2.64E-104 | 5.04E-104 |
| LINC00106    | 2.458354 | 5.790205 | 1.235922 | 6.58E-22  | 7.79E-22  |
| LINC01144    | 1.263749 | 2.925982 | 1.211211 | 4.11E-61  | 6.02E-61  |
| WWC2-AS2     | 0.399669 | 0.904746 | 1.178706 | 2.35E-37  | 2.99E-37  |
| MKLN1-AS     | 1.491716 | 3.33939  | 1.162612 | 6.99E-97  | 1.27E-96  |
| ZNF32-AS1    | 0.325606 | 0.728389 | 1.16158  | 2.59E-33  | 3.23E-33  |
| LINC00471    | 0.354702 | 0.787772 | 1.151173 | 1.07E-58  | 1.54E-58  |
| LINC01270    | 0.487923 | 1.080367 | 1.146796 | 1.06E-20  | 1.24E-20  |
| NCBP2-AS1    | 0.337254 | 0.744738 | 1.142896 | 6.74E-32  | 8.33E-32  |
| LINC00957    | 2.744364 | 6.045929 | 1.139493 | 1.05E-43  | 1.40E-43  |
| C22orf34     | 0.462606 | 1.013326 | 1.131243 | 4.74E-13  | 5.24E-13  |
| ZSCAN16-AS1  | 3.044913 | 6.610623 | 1.118385 | 1.29E-85  | 2.22E-85  |
| LINC00654    | 0.629415 | 1.346637 | 1.097278 | 3.63E-05  | 3.80E-05  |
| SNHG9        | 30.22074 | 64.33847 | 1.090143 | 1.83E-07  | 1.95E-07  |
| FALEC        | 0.425069 | 0.904549 | 1.089499 | 1.23E-42  | 1.62E-42  |
| MED14OS      | 0.629918 | 1.330386 | 1.078609 | 2.41E-51  | 3.34E-51  |
| HMGN3-AS1    | 0.694675 | 1.457289 | 1.068876 | 3.67E-61  | 5.38E-61  |
| ZNF674-AS1   | 2.712686 | 5.514625 | 1.023541 | 2.27E-94  | 4.07E-94  |
| KCTD21-AS1   | 1.331021 | 2.685861 | 1.012851 | 1.91E-17  | 2.17E-17  |
| SLC25A5-AS1  | 0.872683 | 1.753306 | 1.006549 | 6.78E-83  | 1.13E-82  |
| AC034243.1   | 0.504839 | 1.012894 | 1.004589 | 9.56E-05  | 9.96E-05  |
| LINC01315    | 4.645368 | 9.30883  | 1.002807 | 2.03E-07  | 2.16E-07  |
| LINC01301    | 0.606928 | 0.300946 | -1.01202 | 1.89E-33  | 2.35E-33  |
| CD27-AS1     | 31.57672 | 15.64355 | -1.01329 | 9.34E-117 | 1.98E-116 |
| TSC22D1-AS1  | 0.801936 | 0.388186 | -1.04674 | 1.61E-53  | 2.26E-53  |
| SLC16A1-AS1  | 2.552395 | 1.213722 | -1.07241 | 3.44E-93  | 6.11E-93  |
| MMP25-AS1    | 5.695728 | 2.687242 | -1.08375 | 1.40E-116 | 2.95E-116 |
| TRAF3IP2-AS1 | 5.07792  | 2.383753 | -1.091   | 1.05E-114 | 2.17E-114 |
| MIR22HG      | 32.35661 | 15.14266 | -1.09544 | 2.56E-58  | 3.69E-58  |
| FAM106A      | 0.537174 | 0.24858  | -1.11168 | 2.01E-47  | 2.72E-47  |
| TMEM9B-AS1   | 3.570387 | 1.646083 | -1.11704 | 1.41E-79  | 2.27E-79  |
| LINC00847    | 7.331322 | 3.378873 | -1.11753 | 4.46E-133 | 1.07E-132 |
| LINC01128    | 8.363266 | 3.809314 | -1.13454 | 1.24E-141 | 3.17E-141 |
| C2orf27A     | 2.70748  | 1.226804 | -1.14205 | 4.09E-83  | 6.85E-83  |
| ERICH6-AS1   | 1.062701 | 0.48049  | -1.14516 | 7.89E-76  | 1.24E-75  |
| MAGI2-AS3    | 20.28247 | 9.02409  | -1.16838 | 1.15E-19  | 1.33E-19  |
| FTX          | 2.925292 | 1.298086 | -1.17219 | 2.23E-126 | 5.04E-126 |
| FAM87B       | 0.596878 | 0.26257  | -1.18473 | 1.04E-119 | 2.25E-119 |
| AC005753.1   | 0.701451 | 0.307574 | -1.18941 | 3.98E-22  | 4.71E-22  |
| AC144831.1   | 3.973196 | 1.693093 | -1.23064 | 5.46E-70  | 8.33E-70  |
| ATP1A1-AS1   | 5.167659 | 2.192476 | -1.23695 | 3.41E-78  | 5.45E-78  |

|             |          |          |          |           |           |
|-------------|----------|----------|----------|-----------|-----------|
| LINC00115   | 2.933706 | 1.236442 | -1.24653 | 1.04E-110 | 2.09E-110 |
| LINC00472   | 1.224524 | 0.513618 | -1.25345 | 3.07E-86  | 5.32E-86  |
| LINC00342   | 9.317081 | 3.884256 | -1.26224 | 9.45E-119 | 2.02E-118 |
| RNF139-AS1  | 2.781444 | 1.147663 | -1.27713 | 2.35E-116 | 4.94E-116 |
| DICER1-AS1  | 4.176449 | 1.7112   | -1.28727 | 6.50E-140 | 1.64E-139 |
| FAM27C      | 2.328157 | 0.942268 | -1.30498 | 7.64E-94  | 1.36E-93  |
| AC092171.4  | 3.27597  | 1.317052 | -1.31461 | 2.57E-108 | 5.05E-108 |
| MATN1-AS1   | 3.034086 | 1.217014 | -1.31792 | 7.04E-80  | 1.14E-79  |
| LINC01237   | 1.37556  | 0.547064 | -1.33024 | 1.05E-84  | 1.78E-84  |
| TMEM51-AS1  | 1.140276 | 0.452656 | -1.3329  | 2.73E-31  | 3.37E-31  |
| IQCH-AS1    | 2.59655  | 1.030544 | -1.33319 | 3.93E-112 | 7.98E-112 |
| KCNK15-AS1  | 2.094085 | 0.8167   | -1.35844 | 2.21E-60  | 3.23E-60  |
| FAM41C      | 0.723566 | 0.282067 | -1.35909 | 9.60E-166 | 3.20E-165 |
| DLG5-AS1    | 1.27203  | 0.494211 | -1.36393 | 2.03E-92  | 3.59E-92  |
| RPARP-AS1   | 7.578983 | 2.933654 | -1.36931 | 3.04E-85  | 5.20E-85  |
| SBF2-AS1    | 5.693369 | 2.193364 | -1.37614 | 1.05E-73  | 1.62E-73  |
| HEIH        | 26.53925 | 10.19256 | -1.38061 | 2.09E-143 | 5.47E-143 |
| EXTL3-AS1   | 0.955767 | 0.366801 | -1.38166 | 4.72E-112 | 9.57E-112 |
| WDFY3-AS2   | 1.390576 | 0.533491 | -1.38215 | 9.66E-113 | 1.97E-112 |
| LINC01473   | 1.180829 | 0.45101  | -1.38857 | 1.70E-92  | 3.01E-92  |
| PSMD6-AS2   | 1.218122 | 0.464718 | -1.39023 | 8.68E-114 | 1.78E-113 |
| ZNF436-AS1  | 4.281816 | 1.625256 | -1.39756 | 4.33E-141 | 1.10E-140 |
| LINC00857   | 0.786787 | 0.296427 | -1.4083  | 3.67E-48  | 5.00E-48  |
| MIATNB      | 4.499227 | 1.681066 | -1.4203  | 1.10E-164 | 3.60E-164 |
| TMEM220-AS1 | 1.275603 | 0.472562 | -1.43261 | 1.03E-102 | 1.94E-102 |
| FAM66C      | 1.940232 | 0.715776 | -1.43865 | 3.56E-120 | 7.74E-120 |
| HOTAIR      | 5.175646 | 1.897256 | -1.44782 | 6.26E-116 | 1.31E-115 |
| SEC24B-AS1  | 1.190602 | 0.434914 | -1.45289 | 4.10E-164 | 1.32E-163 |
| AC027601.1  | 0.927283 | 0.337428 | -1.45843 | 4.04E-147 | 1.09E-146 |
| TMEM147-AS1 | 10.95642 | 3.964966 | -1.4664  | 9.88E-160 | 3.06E-159 |
| LINC00960   | 3.157714 | 1.139571 | -1.47039 | 1.47E-73  | 2.27E-73  |
| AP4B1-AS1   | 0.825218 | 0.297034 | -1.47415 | 1.62E-130 | 3.78E-130 |
| UNC5B-AS1   | 1.794475 | 0.645899 | -1.47418 | 1.52E-85  | 2.60E-85  |
| NPTN-IT1    | 2.490533 | 0.896017 | -1.47486 | 2.00E-127 | 4.58E-127 |
| STARD4-AS1  | 1.744129 | 0.627431 | -1.47498 | 1.37E-84  | 2.31E-84  |
| LINC00886   | 2.295413 | 0.812359 | -1.49856 | 7.68E-83  | 1.28E-82  |
| PTOV1-AS2   | 12.26277 | 4.324117 | -1.50381 | 1.23E-145 | 3.29E-145 |
| GHRLOS      | 0.914448 | 0.321531 | -1.50794 | 7.84E-131 | 1.84E-130 |
| MIR222HG    | 12.64234 | 4.391506 | -1.52548 | 1.62E-93  | 2.88E-93  |
| SNHG17      | 37.29175 | 12.86697 | -1.53518 | 4.76E-155 | 1.41E-154 |
| HHIP-AS1    | 1.206213 | 0.402472 | -1.58352 | 2.00E-101 | 3.75E-101 |
| DGUOK-AS1   | 4.862538 | 1.608649 | -1.59586 | 1.21E-105 | 2.34E-105 |
| AC002066.1  | 0.729583 | 0.240092 | -1.60349 | 1.76E-10  | 1.92E-10  |
| RUSC1-AS1   | 7.610564 | 2.474916 | -1.62062 | 1.09E-153 | 3.15E-153 |



|              |          |          |          |           |           |
|--------------|----------|----------|----------|-----------|-----------|
| GLIDR        | 1.195052 | 0.388012 | -1.6229  | 1.74E-151 | 4.90E-151 |
| NR2F2-AS1    | 2.107132 | 0.677098 | -1.63784 | 8.25E-113 | 1.69E-112 |
| LOXL1-AS1    | 4.999562 | 1.600946 | -1.64288 | 9.76E-100 | 1.81E-99  |
| LINC00662    | 6.068909 | 1.939989 | -1.64539 | 1.14E-141 | 2.92E-141 |
| SSBP3-AS1    | 1.177762 | 0.375565 | -1.64891 | 5.88E-136 | 1.45E-135 |
| LINC01138    | 3.84182  | 1.224727 | -1.64933 | 6.66E-165 | 2.19E-164 |
| LINC01184    | 14.49388 | 4.606442 | -1.65372 | 4.01E-189 | 2.27E-188 |
| HOXC13-AS    | 3.883176 | 1.231393 | -1.65695 | 5.51E-91  | 9.70E-91  |
| ZNF790-AS1   | 3.799811 | 1.200989 | -1.6617  | 3.46E-168 | 1.18E-167 |
| MALAT1       | 265.0748 | 83.4514  | -1.66739 | 2.80E-99  | 5.18E-99  |
| RBAKDN       | 0.548688 | 0.170696 | -1.68456 | 8.64E-54  | 1.21E-53  |
| HOXA11-AS    | 2.289868 | 0.711316 | -1.6867  | 2.52E-97  | 4.61E-97  |
| C21orf62-AS1 | 0.717889 | 0.221939 | -1.6936  | 1.06E-140 | 2.70E-140 |
| KDM4A-AS1    | 3.244744 | 0.994129 | -1.7066  | 7.58E-140 | 1.91E-139 |
| LINC00173    | 5.416911 | 1.642629 | -1.72146 | 2.52E-64  | 3.75E-64  |
| WEE2-AS1     | 1.698465 | 0.513337 | -1.72625 | 4.19E-131 | 9.85E-131 |
| TMC3-AS1     | 1.089987 | 0.32117  | -1.7629  | 2.91E-44  | 3.89E-44  |
| SNHG21       | 6.004422 | 1.762485 | -1.76841 | 1.16E-175 | 4.48E-175 |
| SNHG12       | 35.29739 | 10.31989 | -1.77413 | 2.44E-165 | 8.11E-165 |
| TMEM254-AS1  | 2.772941 | 0.804599 | -1.78507 | 1.49E-96  | 2.69E-96  |
| ARF4-AS1     | 1.071622 | 0.309801 | -1.79038 | 2.00E-110 | 3.99E-110 |
| LINC00958    | 2.792322 | 0.805406 | -1.79368 | 3.20E-51  | 4.43E-51  |
| AP000442.1   | 2.080708 | 0.583692 | -1.8338  | 9.33E-171 | 3.33E-170 |
| LINC01089    | 19.34098 | 5.39602  | -1.84169 | 1.21E-155 | 3.63E-155 |
| LINC00240    | 1.178665 | 0.328297 | -1.84408 | 4.86E-131 | 1.14E-130 |
| N4BP2L2-IT2  | 3.542802 | 0.973475 | -1.86368 | 1.21E-112 | 2.47E-112 |
| LINC01214    | 1.007774 | 0.274222 | -1.87775 | 7.48E-53  | 1.04E-52  |
| SH3BP5-AS1   | 9.621414 | 2.612614 | -1.88075 | 2.28E-139 | 5.72E-139 |
| CASC2        | 0.813802 | 0.216678 | -1.90913 | 7.31E-120 | 1.58E-119 |
| PITRM1-AS1   | 0.73605  | 0.193562 | -1.92701 | 4.10E-166 | 1.38E-165 |
| MCM3AP-AS1   | 3.725463 | 0.977754 | -1.92988 | 3.12E-188 | 1.71E-187 |
| SNHG10       | 6.437947 | 1.664296 | -1.95169 | 2.43E-181 | 1.05E-180 |
| TOB1-AS1     | 1.564278 | 0.400684 | -1.96496 | 1.30E-121 | 2.86E-121 |
| PITPNA-AS1   | 10.40829 | 2.645216 | -1.97628 | 5.46E-183 | 2.55E-182 |
| CRNDE        | 26.49867 | 6.667861 | -1.99062 | 1.97E-182 | 9.00E-182 |
| COX10-AS1    | 8.662634 | 2.17784  | -1.99191 | 3.09E-182 | 1.38E-181 |
| ZNF561-AS1   | 8.361328 | 2.040265 | -2.03498 | 2.32E-182 | 1.04E-181 |
| LINC00624    | 0.643884 | 0.157012 | -2.03592 | 2.38E-156 | 7.18E-156 |
| DANCR        | 50.2063  | 12.18849 | -2.04235 | 1.60E-181 | 7.00E-181 |
| TTC28-AS1    | 8.171652 | 1.959044 | -2.06048 | 2.16E-182 | 9.84E-182 |
| SRD5A3-AS1   | 1.594809 | 0.377592 | -2.07848 | 5.20E-178 | 2.13E-177 |
| AP000350.5   | 0.588467 | 0.136968 | -2.10312 | 3.08E-81  | 5.07E-81  |
| LINC01341    | 1.285594 | 0.297794 | -2.11005 | 1.33E-136 | 3.28E-136 |
| AC010894.3   | 1.462065 | 0.338371 | -2.11133 | 1.89E-109 | 3.76E-109 |

|              |          |          |          |           |           |
|--------------|----------|----------|----------|-----------|-----------|
| LINC00844    | 1.084993 | 0.250498 | -2.11481 | 3.11E-78  | 4.98E-78  |
| EIF1B-AS1    | 0.833219 | 0.190063 | -2.13222 | 4.37E-170 | 1.54E-169 |
| B4GALT1-AS1  | 2.104602 | 0.475864 | -2.14493 | 5.16E-172 | 1.88E-171 |
| SCOC-AS1     | 1.394303 | 0.313597 | -2.15256 | 1.03E-160 | 3.20E-160 |
| STX18-AS1    | 2.137795 | 0.477735 | -2.16184 | 3.74E-191 | 2.26E-190 |
| DLEU2L       | 0.731059 | 0.163223 | -2.16314 | 1.34E-149 | 3.66E-149 |
| ALOX12-AS1   | 5.975582 | 1.333281 | -2.1641  | 5.85E-193 | 4.04E-192 |
| PPP3CB-AS1   | 4.078556 | 0.896311 | -2.18599 | 1.35E-183 | 6.43E-183 |
| YEATS2-AS1   | 1.904684 | 0.417888 | -2.18836 | 9.78E-184 | 4.67E-183 |
| TNK2-AS1     | 0.61699  | 0.134265 | -2.20016 | 6.54E-85  | 1.11E-84  |
| UBR5-AS1     | 2.725501 | 0.592388 | -2.20191 | 4.71E-183 | 2.21E-182 |
| LINC00607    | 1.3581   | 0.292687 | -2.21416 | 1.84E-17  | 2.09E-17  |
| LINC00702    | 6.278735 | 1.348521 | -2.2191  | 1.39E-96  | 2.53E-96  |
| MYLK-AS1     | 1.772424 | 0.380395 | -2.22015 | 2.46E-178 | 1.02E-177 |
| MIR210HG     | 35.19525 | 7.51888  | -2.22679 | 2.80E-114 | 5.77E-114 |
| LINC-PINT    | 6.993744 | 1.488888 | -2.23183 | 3.13E-179 | 1.31E-178 |
| AC010976.2   | 2.204004 | 0.460902 | -2.25759 | 3.16E-161 | 9.89E-161 |
| SFTA1P       | 1.32082  | 0.275281 | -2.26246 | 5.80E-11  | 6.33E-11  |
| LINC00992    | 0.807257 | 0.168235 | -2.26255 | 1.98E-51  | 2.75E-51  |
| THUMPD3-AS1  | 23.09105 | 4.746008 | -2.28255 | 8.47E-193 | 5.78E-192 |
| DNAJC27-AS1  | 1.977827 | 0.406045 | -2.2842  | 2.18E-133 | 5.22E-133 |
| TRHDE-AS1    | 1.165521 | 0.238996 | -2.28592 | 4.34E-162 | 1.37E-161 |
| KLF3-AS1     | 2.496687 | 0.508847 | -2.29471 | 6.11E-123 | 1.35E-122 |
| LINC00565    | 1.960455 | 0.399536 | -2.29479 | 3.14E-23  | 3.75E-23  |
| HOXA-AS3     | 1.435904 | 0.292352 | -2.29618 | 4.31E-151 | 1.21E-150 |
| MCCC1-AS1    | 2.399251 | 0.479305 | -2.32357 | 1.10E-127 | 2.54E-127 |
| ZNF213-AS1   | 10.08761 | 1.989211 | -2.34232 | 9.21E-192 | 5.71E-191 |
| SLC2A1-AS1   | 1.475545 | 0.290484 | -2.34471 | 8.94E-139 | 2.23E-138 |
| CTC-338M12.4 | 7.64274  | 1.504286 | -2.34501 | 4.69E-192 | 2.98E-191 |
| PAX8-AS1     | 16.76119 | 3.219863 | -2.38005 | 9.20E-136 | 2.26E-135 |
| OSMR-AS1     | 0.934124 | 0.178669 | -2.38633 | 5.60E-151 | 1.56E-150 |
| SAP30L-AS1   | 1.167237 | 0.219779 | -2.40897 | 3.96E-173 | 1.47E-172 |
| FLJ12825     | 0.570884 | 0.106606 | -2.42091 | 6.57E-158 | 2.01E-157 |
| SEMA3F-AS1   | 2.974292 | 0.551603 | -2.43084 | 1.70E-171 | 6.12E-171 |
| C10orf55     | 0.630503 | 0.116902 | -2.43121 | 6.46E-153 | 1.86E-152 |
| TPT1-AS1     | 22.47214 | 4.154585 | -2.43536 | 6.60E-187 | 3.46E-186 |
| HOTAIRM1     | 16.23258 | 2.987165 | -2.44204 | 1.37E-176 | 5.39E-176 |
| LIFR-AS1     | 0.762903 | 0.139757 | -2.44858 | 1.80E-149 | 4.92E-149 |
| DPP9-AS1     | 0.71603  | 0.126864 | -2.49673 | 1.97E-152 | 5.63E-152 |
| PRC1-AS1     | 0.598213 | 0.105891 | -2.49807 | 1.45E-145 | 3.86E-145 |
| ZNF667-AS1   | 13.6643  | 2.413193 | -2.5014  | 2.14E-177 | 8.53E-177 |
| DARS-AS1     | 2.239853 | 0.394587 | -2.50499 | 7.18E-154 | 2.10E-153 |
| RRN3P2       | 1.297496 | 0.226163 | -2.52029 | 1.45E-158 | 4.45E-158 |
| AC007292.3   | 0.592693 | 0.102475 | -2.53201 | 3.19E-152 | 9.08E-152 |

|              |          |          |          |           |           |
|--------------|----------|----------|----------|-----------|-----------|
| MIRLET7BHG   | 8.935342 | 1.507051 | -2.5678  | 6.68E-162 | 2.10E-161 |
| LINC01127    | 0.634039 | 0.10681  | -2.56953 | 2.12E-142 | 5.51E-142 |
| C1RL-AS1     | 3.695522 | 0.619459 | -2.5767  | 7.52E-171 | 2.69E-170 |
| LINC00630    | 1.67996  | 0.281428 | -2.57759 | 6.14E-188 | 3.36E-187 |
| BDNF-AS      | 2.606779 | 0.432934 | -2.59005 | 3.71E-190 | 2.18E-189 |
| STXBP5-AS1   | 1.689337 | 0.276875 | -2.60915 | 1.02E-173 | 3.82E-173 |
| DLEU1        | 6.443384 | 1.033297 | -2.64056 | 1.90E-184 | 9.24E-184 |
| LINC00882    | 1.332636 | 0.213647 | -2.64098 | 1.82E-125 | 4.10E-125 |
| LINC01572    | 0.776909 | 0.119061 | -2.70605 | 3.00E-120 | 6.54E-120 |
| TMEM161B-AS1 | 7.986859 | 1.223576 | -2.70652 | 1.40E-192 | 9.38E-192 |
| FAM66B       | 1.646565 | 0.249542 | -2.7221  | 1.74E-155 | 5.18E-155 |
| SNHG14       | 11.03843 | 1.624535 | -2.76444 | 3.07E-189 | 1.74E-188 |
| TBX5-AS1     | 1.458977 | 0.214368 | -2.76679 | 1.15E-116 | 2.43E-116 |
| MAFTRR       | 1.241478 | 0.181619 | -2.77307 | 1.02E-57  | 1.47E-57  |
| DIRC1        | 1.130975 | 0.165444 | -2.77315 | 2.65E-18  | 3.03E-18  |
| CYP4F26P     | 1.173408 | 0.166647 | -2.81584 | 1.07E-41  | 1.40E-41  |
| SNHG8        | 180.2256 | 25.49341 | -2.82161 | 1.64E-192 | 1.08E-191 |
| MBNL1-AS1    | 2.314569 | 0.325058 | -2.83198 | 1.11E-179 | 4.68E-179 |
| NEAT1        | 1094.211 | 153.3718 | -2.83479 | 4.90E-192 | 3.10E-191 |
| AC069213.1   | 2.077805 | 0.290534 | -2.83828 | 1.06E-89  | 1.85E-89  |
| LINC01503    | 10.94274 | 1.521668 | -2.84625 | 1.11E-166 | 3.75E-166 |
| CA3-AS1      | 0.883275 | 0.122195 | -2.85368 | 2.62E-40  | 3.40E-40  |
| FSIP2-AS1    | 0.638019 | 0.087888 | -2.85986 | 3.56E-77  | 5.66E-77  |
| AC007743.1   | 0.735893 | 0.09939  | -2.88833 | 5.46E-166 | 1.83E-165 |
| LINC00877    | 0.743305 | 0.10012  | -2.89222 | 3.39E-56  | 4.82E-56  |
| LAMTOR5-AS1  | 2.065491 | 0.276136 | -2.90303 | 3.49E-193 | 2.45E-192 |
| NEXN-AS1     | 0.609118 | 0.08093  | -2.91198 | 9.87E-82  | 1.63E-81  |
| PART1        | 0.900483 | 0.11909  | -2.91865 | 1.69E-124 | 3.76E-124 |
| PXN-AS1      | 8.531238 | 1.11831  | -2.93144 | 2.12E-192 | 1.37E-191 |
| NUTM2A-AS1   | 18.48931 | 2.409426 | -2.93993 | 7.95E-192 | 4.96E-191 |
| STARD13-AS   | 0.689054 | 0.088936 | -2.95378 | 4.95E-124 | 1.10E-123 |
| ADAMTS9-AS2  | 1.100387 | 0.134816 | -3.02895 | 3.93E-170 | 1.39E-169 |
| LINC01554    | 3.673193 | 0.443863 | -3.04885 | 1.07E-133 | 2.58E-133 |
| FENRR        | 0.923243 | 0.111434 | -3.05052 | 6.04E-80  | 9.83E-80  |
| LINC01197    | 1.022178 | 0.123329 | -3.05106 | 2.30E-94  | 4.11E-94  |
| LINC01176    | 6.340285 | 0.745498 | -3.08827 | 1.03E-108 | 2.04E-108 |
| BMS1P4       | 1.329254 | 0.152295 | -3.12568 | 5.30E-189 | 2.98E-188 |
| ITGA9-AS1    | 5.657126 | 0.637267 | -3.1501  | 1.15E-194 | 9.23E-194 |
| NR2F1-AS1    | 7.18983  | 0.808055 | -3.15343 | 5.51E-123 | 1.22E-122 |
| FAM201A      | 0.979206 | 0.107776 | -3.18357 | 1.92E-60  | 2.80E-60  |
| LRP4-AS1     | 2.701738 | 0.295101 | -3.19461 | 1.69E-140 | 4.27E-140 |
| LINC00885    | 1.241804 | 0.131859 | -3.23537 | 2.91E-55  | 4.12E-55  |
| AC006449.2   | 21.20827 | 2.215057 | -3.25921 | 6.89E-188 | 3.75E-187 |
| AF230666.2   | 0.840705 | 0.087741 | -3.26028 | 2.66E-180 | 1.14E-179 |

|              |          |          |          |           |           |
|--------------|----------|----------|----------|-----------|-----------|
| XIST         | 44.50989 | 4.618574 | -3.26861 | 5.74E-60  | 8.37E-60  |
| FAM182B      | 3.696428 | 0.37978  | -3.2829  | 9.77E-102 | 1.84E-101 |
| TP53TG1      | 26.58336 | 2.720649 | -3.2885  | 1.31E-191 | 8.10E-191 |
| ADAMTSL4-AS1 | 0.724721 | 0.073187 | -3.30776 | 1.77E-186 | 9.17E-186 |
| SNHG5        | 391.0873 | 38.91113 | -3.32924 | 3.16E-185 | 1.57E-184 |
| ARRDC3-AS1   | 1.174326 | 0.113745 | -3.36796 | 1.40E-191 | 8.59E-191 |
| LIPE-AS1     | 4.895971 | 0.467848 | -3.38748 | 6.91E-190 | 4.02E-189 |
| LINC00894    | 4.17842  | 0.397354 | -3.39446 | 1.13E-188 | 6.25E-188 |
| AC016747.3   | 3.266458 | 0.310003 | -3.39737 | 7.79E-165 | 2.55E-164 |
| LINC00592    | 0.826191 | 0.07765  | -3.41141 | 9.07E-119 | 1.95E-118 |
| LINC01451    | 2.379028 | 0.222446 | -3.41885 | 1.04E-54  | 1.46E-54  |
| AL133243.1   | 1.432385 | 0.133841 | -3.41982 | 1.40E-192 | 9.38E-192 |
| SOX21-AS1    | 2.508564 | 0.22695  | -3.46641 | 5.78E-71  | 8.82E-71  |
| AC024560.3   | 16.64115 | 1.49571  | -3.47585 | 1.71E-192 | 1.12E-191 |
| FLNB-AS1     | 1.701279 | 0.148711 | -3.51604 | 3.00E-186 | 1.53E-185 |
| LINC01305    | 0.611235 | 0.053405 | -3.51668 | 1.18E-131 | 2.78E-131 |
| SPAG5-AS1    | 2.448316 | 0.211883 | -3.53045 | 2.64E-194 | 2.02E-193 |
| MLIP-IT1     | 0.732129 | 0.06208  | -3.5599  | 6.09E-73  | 9.36E-73  |
| RGS5         | 10.65814 | 0.881316 | -3.59615 | 2.17E-182 | 9.84E-182 |
| PVT1         | 25.80178 | 2.119278 | -3.60583 | 1.32E-180 | 5.67E-180 |
| LINC01348    | 0.662106 | 0.053263 | -3.63586 | 7.09E-150 | 1.95E-149 |
| HOXC-AS3     | 2.971296 | 0.23457  | -3.663   | 1.09E-187 | 5.82E-187 |
| ADAMTS9-AS1  | 0.930023 | 0.072472 | -3.68177 | 3.89E-99  | 7.17E-99  |
| OVOL1-AS1    | 2.797523 | 0.212193 | -3.7207  | 1.48E-57  | 2.13E-57  |
| C3orf35      | 2.694203 | 0.20232  | -3.73515 | 1.99E-180 | 8.53E-180 |
| LINC01140    | 4.073884 | 0.302385 | -3.75195 | 1.60E-184 | 7.83E-184 |
| POLR2J4      | 4.59284  | 0.338483 | -3.76223 | 1.62E-192 | 1.07E-191 |
| STX17-AS1    | 2.464528 | 0.181461 | -3.76358 | 4.51E-86  | 7.79E-86  |
| AC009120.5   | 1.124951 | 0.082457 | -3.77007 | 4.61E-169 | 1.60E-168 |
| AC007036.5   | 0.60884  | 0.044595 | -3.7711  | 1.12E-83  | 1.89E-83  |
| CADM3-AS1    | 1.436371 | 0.104326 | -3.78325 | 7.12E-169 | 2.47E-168 |
| LINC01515    | 2.525153 | 0.182362 | -3.79149 | 1.14E-116 | 2.42E-116 |
| NUTM2B-AS1   | 15.3575  | 1.104632 | -3.79731 | 1.42E-194 | 1.13E-193 |
| LINC01119    | 3.913548 | 0.27417  | -3.83534 | 1.46E-114 | 3.02E-114 |
| KRT73-AS1    | 0.653321 | 0.045459 | -3.84515 | 2.90E-61  | 4.26E-61  |
| ADD3-AS1     | 0.747305 | 0.050379 | -3.89079 | 2.30E-184 | 1.11E-183 |
| PTOV1-AS1    | 5.926586 | 0.390231 | -3.9248  | 9.08E-195 | 7.66E-194 |
| AC009950.1   | 1.541153 | 0.099865 | -3.94788 | 8.74E-80  | 1.42E-79  |
| FZD10-AS1    | 2.804088 | 0.181584 | -3.94883 | 9.03E-80  | 1.46E-79  |
| MIR205HG     | 101.3149 | 6.348227 | -3.99635 | 5.49E-137 | 1.36E-136 |
| LINC00632    | 1.807521 | 0.112731 | -4.00305 | 7.14E-170 | 2.51E-169 |
| MRPL23-AS1   | 0.714265 | 0.043828 | -4.02654 | 3.27E-152 | 9.28E-152 |
| CBR3-AS1     | 4.996921 | 0.303785 | -4.03992 | 6.20E-191 | 3.71E-190 |
| SCGB1B2P     | 93.56536 | 5.595267 | -4.0637  | 2.67E-42  | 3.51E-42  |

|             |          |          |          |           |           |
|-------------|----------|----------|----------|-----------|-----------|
| LMO7-AS1    | 4.683839 | 0.272984 | -4.1008  | 8.52E-125 | 1.90E-124 |
| PCBP1-AS1   | 29.07037 | 1.682738 | -4.11067 | 1.09E-194 | 8.78E-194 |
| EMX2OS      | 8.190331 | 0.449573 | -4.18729 | 2.34E-186 | 1.20E-185 |
| AC129492.1  | 1.94256  | 0.106197 | -4.19314 | 3.14E-135 | 7.69E-135 |
| PRKG1-AS1   | 0.759046 | 0.041377 | -4.1973  | 1.14E-22  | 1.36E-22  |
| ZFAS1       | 205.2696 | 11.03358 | -4.21755 | 1.32E-195 | 1.27E-194 |
| GUSBP11     | 14.14364 | 0.752095 | -4.2331  | 8.98E-195 | 7.66E-194 |
| OR2A1-AS1   | 13.13706 | 0.69207  | -4.24658 | 7.72E-192 | 4.85E-191 |
| EDRF1-AS1   | 1.232653 | 0.064268 | -4.26152 | 8.14E-188 | 4.40E-187 |
| RBM5-AS1    | 2.850777 | 0.148024 | -4.26746 | 1.54E-189 | 8.88E-189 |
| LINC01123   | 2.235056 | 0.115304 | -4.2768  | 3.29E-179 | 1.38E-178 |
| LINC01550   | 5.726773 | 0.2951   | -4.27845 | 1.03E-145 | 2.76E-145 |
| LINC01106   | 3.582221 | 0.18429  | -4.2808  | 2.08E-177 | 8.34E-177 |
| C5orf66     | 1.872402 | 0.096283 | -4.28147 | 2.05E-189 | 1.18E-188 |
| PRMT5-AS1   | 0.801153 | 0.04108  | -4.28556 | 1.97E-181 | 8.58E-181 |
| LINC00339   | 14.65497 | 0.746392 | -4.29531 | 9.01E-195 | 7.66E-194 |
| SCARNA9     | 3.008926 | 0.150802 | -4.31852 | 5.39E-186 | 2.73E-185 |
| ADIRF-AS1   | 32.744   | 1.639957 | -4.3195  | 1.19E-164 | 3.86E-164 |
| AL450992.2  | 1.903489 | 0.092622 | -4.36115 | 3.07E-159 | 9.46E-159 |
| LINC01088   | 3.692961 | 0.178902 | -4.36754 | 1.06E-171 | 3.82E-171 |
| EGFR-AS1    | 0.628534 | 0.030374 | -4.37109 | 9.72E-188 | 5.23E-187 |
| LINC00578   | 2.213516 | 0.105317 | -4.39352 | 2.42E-21  | 2.84E-21  |
| FAM13A-AS1  | 6.753153 | 0.317635 | -4.41012 | 5.55E-193 | 3.87E-192 |
| AC083843.1  | 1.818573 | 0.085229 | -4.41531 | 2.29E-193 | 1.62E-192 |
| AC068580.5  | 0.930637 | 0.041384 | -4.49108 | 3.35E-79  | 5.40E-79  |
| SOX9-AS1    | 5.93884  | 0.250386 | -4.56796 | 4.80E-64  | 7.13E-64  |
| CALML3-AS1  | 3.875714 | 0.159134 | -4.60615 | 3.97E-74  | 6.16E-74  |
| INTS6-AS1   | 4.451123 | 0.181446 | -4.61656 | 9.32E-195 | 7.71E-194 |
| LINC00964   | 1.689212 | 0.068519 | -4.6237  | 1.73E-126 | 3.92E-126 |
| SAPCD1-AS1  | 3.030352 | 0.120237 | -4.65553 | 5.77E-108 | 1.13E-107 |
| MIR4435-2HG | 51.65867 | 1.973336 | -4.7103  | 1.85E-185 | 9.22E-185 |
| LIMD1-AS1   | 6.329953 | 0.241096 | -4.71451 | 2.02E-194 | 1.58E-193 |
| CFLAR-AS1   | 1.782883 | 0.066234 | -4.7505  | 9.65E-193 | 6.54E-192 |
| LINC00640   | 5.320488 | 0.193214 | -4.78329 | 9.97E-152 | 2.83E-151 |
| GATA3-AS1   | 1.075225 | 0.037778 | -4.83094 | 6.98E-116 | 1.46E-115 |
| NEBL-AS1    | 0.978412 | 0.033857 | -4.8529  | 7.96E-133 | 1.89E-132 |
| PLA2G4E-AS1 | 2.992208 | 0.103075 | -4.85945 | 2.94E-46  | 3.96E-46  |
| CYP1B1-AS1  | 2.392674 | 0.081734 | -4.87155 | 4.92E-190 | 2.88E-189 |
| LINC00452   | 0.693591 | 0.022929 | -4.91883 | 1.89E-43  | 2.51E-43  |
| MEG9        | 1.58736  | 0.052299 | -4.92371 | 8.63E-175 | 3.30E-174 |
| MAGI1-IT1   | 0.665472 | 0.021834 | -4.92974 | 3.90E-176 | 1.51E-175 |
| DSG1-AS1    | 0.652787 | 0.021034 | -4.9558  | 3.71E-71  | 5.68E-71  |
| LINC00545   | 0.706293 | 0.022678 | -4.96092 | 2.46E-106 | 4.76E-106 |
| PGM5-AS1    | 1.193583 | 0.037814 | -4.98023 | 9.94E-78  | 1.58E-77  |

|            |          |          |          |           |           |
|------------|----------|----------|----------|-----------|-----------|
| BCRP3      | 1.60415  | 0.049876 | -5.00733 | 6.61E-187 | 3.46E-186 |
| RFPL3S     | 1.754774 | 0.053012 | -5.04883 | 4.27E-194 | 3.20E-193 |
| TTY14      | 4.479372 | 0.126687 | -5.14395 | 4.86E-47  | 6.56E-47  |
| ENTPD1-AS1 | 3.524306 | 0.099574 | -5.14542 | 9.25E-195 | 7.71E-194 |
| USP3-AS1   | 2.606759 | 0.073602 | -5.14637 | 9.52E-195 | 7.81E-194 |
| HCG25      | 19.02362 | 0.532655 | -5.15845 | 4.68E-194 | 3.48E-193 |
| ACTA2-AS1  | 14.89918 | 0.409567 | -5.18499 | 2.79E-174 | 1.05E-173 |
| LINC00893  | 7.920509 | 0.217357 | -5.18745 | 1.98E-194 | 1.56E-193 |
| FAM215B    | 1.686869 | 0.044651 | -5.2395  | 8.75E-195 | 7.66E-194 |
| MEG3       | 96.1555  | 2.313153 | -5.37744 | 1.45E-186 | 7.58E-186 |
| GTF3C2-AS1 | 1.348029 | 0.0322   | -5.38766 | 1.36E-182 | 6.28E-182 |
| AC058791.1 | 1.380499 | 0.032348 | -5.41535 | 7.39E-191 | 4.40E-190 |
| THRB-AS1   | 0.697376 | 0.016058 | -5.44054 | 9.74E-183 | 4.50E-182 |
| LINC01133  | 8.209187 | 0.184869 | -5.47266 | 2.54E-191 | 1.55E-190 |
| AC113404.1 | 2.13514  | 0.042858 | -5.63862 | 6.48E-195 | 5.99E-194 |
| AC253572.1 | 3.460683 | 0.06857  | -5.65734 | 1.70E-164 | 5.49E-164 |
| MIR99AHG   | 4.685855 | 0.09182  | -5.67336 | 2.09E-194 | 1.62E-193 |
| SNHG22     | 3.490571 | 0.06612  | -5.72224 | 3.22E-192 | 2.06E-191 |
| AC074286.1 | 3.163813 | 0.056345 | -5.81123 | 2.35E-194 | 1.81E-193 |
| AP001437.1 | 0.782453 | 0.013764 | -5.82906 | 2.42E-176 | 9.46E-176 |
| AC005562.1 | 3.919947 | 0.066897 | -5.87275 | 8.02E-194 | 5.82E-193 |
| DIO3OS     | 11.17794 | 0.184503 | -5.92087 | 8.84E-165 | 2.89E-164 |
| HAND2-AS1  | 4.298149 | 0.070549 | -5.92895 | 2.84E-189 | 1.62E-188 |
| AC005538.3 | 1.052256 | 0.016492 | -5.99562 | 1.89E-111 | 3.81E-111 |
| MIR497HG   | 3.018223 | 0.0473   | -5.99572 | 3.00E-194 | 2.28E-193 |
| FAM157C    | 4.472202 | 0.068181 | -6.03547 | 8.39E-193 | 5.77E-192 |
| TTN-AS1    | 10.71096 | 0.159295 | -6.07125 | 9.00E-195 | 7.66E-194 |
| AC009403.2 | 3.238505 | 0.048157 | -6.07143 | 2.05E-193 | 1.46E-192 |
| AP006222.2 | 2.575104 | 0.034981 | -6.2019  | 1.30E-197 | 1.35E-196 |
| AC007620.3 | 11.44544 | 0.147233 | -6.28052 | 1.33E-193 | 9.58E-193 |
| LINC01229  | 2.524878 | 0.031407 | -6.32899 | 1.25E-42  | 1.65E-42  |
| LINC01300  | 0.637882 | 0.007747 | -6.36358 | 2.35E-90  | 4.13E-90  |
| RASSF1-AS1 | 1.015024 | 0.012275 | -6.36967 | 1.03E-196 | 1.05E-195 |
| LINC00968  | 8.345095 | 0.100259 | -6.37913 | 3.00E-170 | 1.06E-169 |
| TEX26-AS1  | 0.858822 | 0.010137 | -6.40464 | 7.51E-169 | 2.60E-168 |
| AC073052.1 | 0.831954 | 0.009291 | -6.48451 | 2.32E-184 | 1.12E-183 |
| MEG8       | 1.361271 | 0.013632 | -6.64177 | 5.41E-85  | 9.23E-85  |
| EML2-AS1   | 1.125717 | 0.011093 | -6.66499 | 1.68E-185 | 8.43E-185 |
| FAM182A    | 4.218696 | 0.041496 | -6.66767 | 7.28E-163 | 2.31E-162 |
| HOXA10-AS  | 4.699957 | 0.045778 | -6.68185 | 7.25E-194 | 5.31E-193 |
| AP000432.1 | 0.962951 | 0.009338 | -6.68827 | 3.17E-200 | 3.58E-199 |
| IL20RB-AS1 | 3.832061 | 0.034773 | -6.78403 | 2.03E-134 | 4.94E-134 |
| AGAP11     | 3.129764 | 0.028007 | -6.8041  | 2.48E-187 | 1.32E-186 |
| AP001189.4 | 0.975477 | 0.008209 | -6.89283 | 5.19E-196 | 5.13E-195 |

|                            |          |          |          |           |           |
|----------------------------|----------|----------|----------|-----------|-----------|
| PP7080                     | 14.3535  | 0.114268 | -6.97284 | 8.84E-195 | 7.66E-194 |
| AC009303.2                 | 0.957118 | 0.00746  | -7.00336 | 4.92E-195 | 4.59E-194 |
| VIPR1-AS1                  | 3.262545 | 0.02541  | -7.00444 | 1.16E-71  | 1.77E-71  |
| SLC8A1-AS1                 | 2.009647 | 0.015198 | -7.04693 | 3.09E-175 | 1.19E-174 |
| AC245100.1                 | 1.840171 | 0.013897 | -7.04895 | 2.43E-195 | 2.29E-194 |
| AC017074.2                 | 0.656251 | 0.004797 | -7.09599 | 3.58E-185 | 1.77E-184 |
| JPX                        | 14.17769 | 0.089405 | -7.30905 | 8.95E-195 | 7.66E-194 |
| ABALON                     | 0.754611 | 0.004332 | -7.44449 | 1.09E-194 | 8.78E-194 |
| AC133644.2                 | 3.069197 | 0.017448 | -7.45862 | 6.31E-184 | 3.03E-183 |
| AF131215.2                 | 2.008859 | 0.01101  | -7.51146 | 1.78E-195 | 1.70E-194 |
| DTX2P1-UPK3BP1-<br>PMS2P11 | 7.593458 | 0.038585 | -7.62059 | 9.12E-195 | 7.66E-194 |
| LINC01001                  | 17.62141 | 0.085443 | -7.68815 | 9.03E-195 | 7.66E-194 |
| AC108142.1                 | 1.17557  | 0.005349 | -7.77995 | 4.81E-127 | 1.10E-126 |
| AP000439.3                 | 1.329026 | 0.005148 | -8.01224 | 3.68E-100 | 6.87E-100 |
| MYCBP2-AS1                 | 1.420594 | 0.005136 | -8.11151 | 1.59E-181 | 6.96E-181 |
| AC016629.3                 | 3.511403 | 0.010436 | -8.39431 | 2.61E-182 | 1.17E-181 |
| LINC01002                  | 39.87939 | 0.117425 | -8.40776 | 8.34E-195 | 7.58E-194 |
| AC010168.1                 | 51.36694 | 0.095412 | -9.07245 | 6.94E-154 | 2.03E-153 |
| AC110615.1                 | 1.959932 | 0.002902 | -9.39969 | 4.92E-67  | 7.37E-67  |
| AC017002.1                 | 0.859906 | 0.001253 | -9.42252 | 1.39E-164 | 4.51E-164 |
| SMAD5-AS1                  | 1.317425 | 0.001857 | -9.47057 | 3.60E-178 | 1.48E-177 |
| FAM223A                    | 0.785587 | 0.001094 | -9.48736 | 3.26E-199 | 3.57E-198 |
| LINC01527                  | 2.22996  | 0.002884 | -9.59456 | 3.93E-109 | 7.79E-109 |
| STAG3L5P-PVRIG2<br>P-PILRB | 34.80403 | 0.042604 | -9.67405 | 7.83E-195 | 7.18E-194 |
| CERS6-AS1                  | 12.54412 | 0.013815 | -9.8266  | 3.22E-178 | 1.33E-177 |
| SLX1A-SULT1A3              | 9.758825 | 0.004309 | -11.1451 | 1.59E-196 | 1.58E-195 |
| SLX1B-SULT1A4              | 3.833238 | 0.001523 | -11.2977 | 4.60E-199 | 4.92E-198 |
| AC021066.1                 | 23.77139 | 0.007589 | -11.613  | 1.67E-90  | 2.93E-90  |
| ZSWIM8-AS1                 | 2.600811 | 0.000683 | -11.8957 | 6.81E-196 | 6.66E-195 |
| CCDC39                     | 2.098981 | 0.000214 | -13.2569 | 7.89E-204 | 9.44E-203 |
| RMRP                       | 6.053714 | 0.000603 | -13.2925 | 3.02E-177 | 1.20E-176 |
| AP002518.1                 | 55.15734 | 0.004461 | -13.5938 | 2.02E-76  | 3.18E-76  |
| AL589743.1                 | 1.643619 | 0.000126 | -13.6754 | 4.95E-202 | 5.73E-201 |
| AC138035.2                 | 9.487859 | 0.000395 | -14.5506 | 1.20E-203 | 1.42E-202 |
| AL162151.3                 | 496.8335 | 0.014072 | -15.1077 | 8.37E-159 | 2.57E-158 |
| AC159540.1                 | 14.75844 | 0.000386 | -15.221  | 2.79E-204 | 3.37E-203 |
| AC055736.1                 | 124.3866 | 0.002881 | -15.3977 | 6.96E-82  | 1.15E-81  |
| AC007009.1                 | 1.035929 | 1.90E-07 | -22.3821 | 4.34E-116 | 9.10E-116 |
| LINC01260                  | 1.152847 | 1.90E-07 | -22.5364 | 7.01E-199 | 7.42E-198 |
| TGFB2-OT1                  | 1.382961 | 1.90E-07 | -22.799  | 1.48E-177 | 5.94E-177 |
| LINC00941                  | 1.622732 | 1.90E-07 | -23.0296 | 4.40E-153 | 1.27E-152 |
| AC234582.1                 | 1.747141 | 1.90E-07 | -23.1362 | 1.21E-151 | 3.42E-151 |



---

|            |          |          |          |           |           |
|------------|----------|----------|----------|-----------|-----------|
| NAV2-AS1   | 2.2499   | 1.90E-07 | -23.5011 | 2.82E-144 | 7.45E-144 |
| AC005253.2 | 3.087425 | 1.90E-07 | -23.9576 | 1.79E-204 | 2.19E-203 |
| RNF185-AS1 | 3.98891  | 1.90E-07 | -24.3272 | 3.27E-142 | 8.44E-142 |
| PAPPA-AS1  | 4.059257 | 1.90E-07 | -24.3524 | 9.74E-200 | 1.09E-198 |
| FOXD1-AS1  | 8.620759 | 1.90E-07 | -25.439  | 2.60E-199 | 2.87E-198 |
| AC005523.2 | 17.71446 | 1.90E-07 | -26.478  | 1.76E-204 | 2.18E-203 |

---

99

**Supplementary table 5.** Mapping of immune landscape based on computational framework.

|                      | <b>More in low-risk subgroup</b>                                                                                                                                                                                                                                                    | <b>More in high-risk subgroup</b>                                               | <b>Meaninglessly</b>                                                                                                                                                                              |
|----------------------|-------------------------------------------------------------------------------------------------------------------------------------------------------------------------------------------------------------------------------------------------------------------------------------|---------------------------------------------------------------------------------|---------------------------------------------------------------------------------------------------------------------------------------------------------------------------------------------------|
| <b>CIBERSORT</b>     | B cell memory, T cell CD8, T cell CD4 na ěve, CD4 memory activated, T cell regulatory (Tregs), T cell gamma delta, Macrophage M1                                                                                                                                                    | T cell follicular helper, Macrophages M2, Dendritic cell activated, Eosinophils | B cell na ěve, Plasma cell, T cell CD4 memory resting, NK cell resting, NK cell activated, Monocytes, Macrophages M0, Dendritic cell resting, Mast cell resting, Mast cell activated, Neutrophils |
| <b>CIBERSORT-ABS</b> | B cell memory, B cell plasma, Macrophage M0, Macrophage M1, Macrophage M2, Monocyte, NK cell activated, T cell CD4 memory activated, T cell CD4 memory resting, T cell CD8, T cell follicular helper, T cell gamma delta, T cell regulatory (Tregs), Myeloid dendritic cell resting | Myeloid dendritic cell activated, NK cell resting                               | B cell naive, Eosinophil, Mast cell activated, Mast cell resting, Neutrophil, T cell CD4 naive                                                                                                    |
| <b>EPIC</b>          | B cell, Macrophage, T cell CD4, T cell CD8                                                                                                                                                                                                                                          | NK cell, uncharacterized cells                                                  | Cancer associated fibroblast, Endothelial cell                                                                                                                                                    |
| <b>MCPCOUNTER</b>    | B cell, Endothelial cell, Macrophage/Monocyte, Monocyte, Myeloid dendritic cell, NK cell, T cell, T cell CD8                                                                                                                                                                        | -                                                                               | Cancer associated fibroblast, Neutrophil                                                                                                                                                          |
| <b>QUANTISEQ</b>     | B cell, Macrophage M1, Macrophage M2, T cell CD8, T cell regulatory (Tregs)                                                                                                                                                                                                         | T cell CD4 (non-regulatory), uncharacterized cells                              | Monocyte, Myeloid dendritic cell, Neutrophil, NK cell                                                                                                                                             |
| <b>TIMER</b>         | B cell, Macrophage, Myeloid dendritic cell, Neutrophil, T cell CD4, T cell CD8                                                                                                                                                                                                      | -                                                                               | -                                                                                                                                                                                                 |
| <b>TISIDB</b>        | Activated B cell, Activated CD4 T cell, Activated CD8 T cell, T cell CD4 central memory, T cell CD8 central memory, T cell CD4 activated memory, T cell CD8 activated memory, T cell gamma delta, B cell naive, B cell memory, T cell regulatory (Tregs), T                         | -                                                                               | CD56bright natural killer cell, CD56dim natural killer cell                                                                                                                                       |

cell follicular helper, T cell CD4 Th1, Type 17 T helper cell, T cell CD4 Th2, Activated dendritic cell, Eosinophil, Immature dendritic cell, Macrophage, Mast cell, MDSC, Monocyte, NK cell, T cell NK, Neutrophil, Plasmacytoid dendritic cell

B cell, B cell memory, B cell naive, B cell plasma, Class-switched memory B cell, Endothelial cell, Macrophage, Macrophage M1, Macrophage M2, Monocyte, Myeloid dendritic cell, Myeloid dendritic cell activated, Plasmacytoid dendritic cell, T cell CD4 (non-regulatory), T cell CD4 effector memory, T cell CD4 memory, T cell CD4 naive, T cell CD4 Th2, T cell CD8, T cell CD8 central memory, T cell CD8 effector memory, T cell CD8 naive

**XCELL**

T cell NK

Cancer associated fibroblast, Common lymphoid progenitor, Common myeloid progenitor, Eosinophil, Granulocyte-monocyte progenitor, Hematopoietic stem cell, Mast cell, Neutrophil, NK cell, T cell CD4 central memory, T cell CD4 Th1, T cell gamma delta, T cell regulatory (Tregs)

**Results of intersection**

T cell CD8, B cell memory, Macrophage M1

uncharacterized cells

Cancer associated fibroblast
